# Supplementary material
Source: publisher figshare collection journal article supplement (https://gsapubs.figshare.com/ndownloader/files/22740410)
Supplement: Supplementary file 1 [file 22740410]

GSA Data Repository Item # 9223

Title of article Oblique Extensional Tectonics in the Malawi Rift, Africa

Author(s) J. Chorowicz and C. Sorlien

see Bulletin v. 104, P. 1015 - 1023

**Contents**

34 pg.

---

---

---

---

---

---

---

---

---

---

Contoured poles to all  
measured faults -  
program "Stereo"

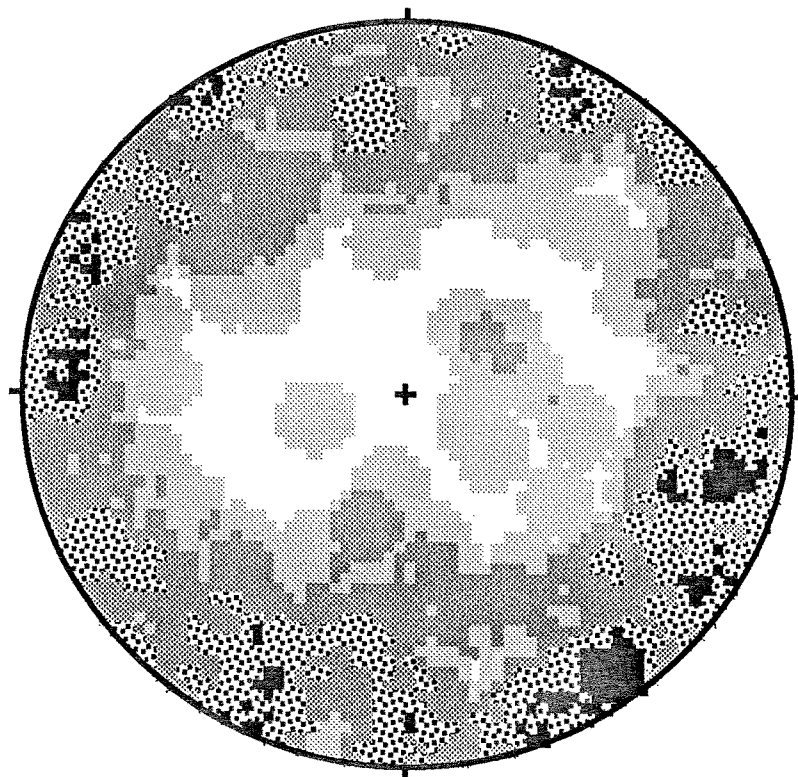

| Data                                                                                         | Schmidt Equal Area Projection | Statistics |
|----------------------------------------------------------------------------------------------|-------------------------------|------------|
| malawi                                                                                       |                               |            |
|  0.3-1.3% |                               |            |
|  1.3-2.4% |                               |            |
|  2.4-3.4% |                               |            |
|  3.4-4.4% |                               |            |
| N = 383                                                                                      |                               |            |

# EXPLANATION

malawi

0.3-1.3%

1.3-2.4%

2.4-3.5%

3.5-4.6%

Schmidt Equal Area Projection

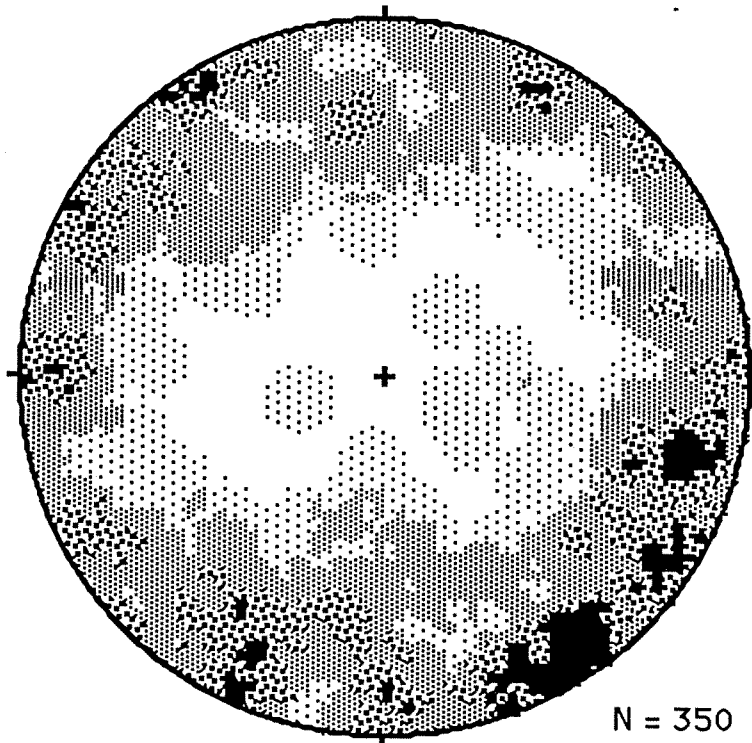

contoured poles to faults  
with striations + sense  
determined -  
program "stereo"

Right dihedral solution for the  
350 striation measures with sense  
determined - All of Malawi.

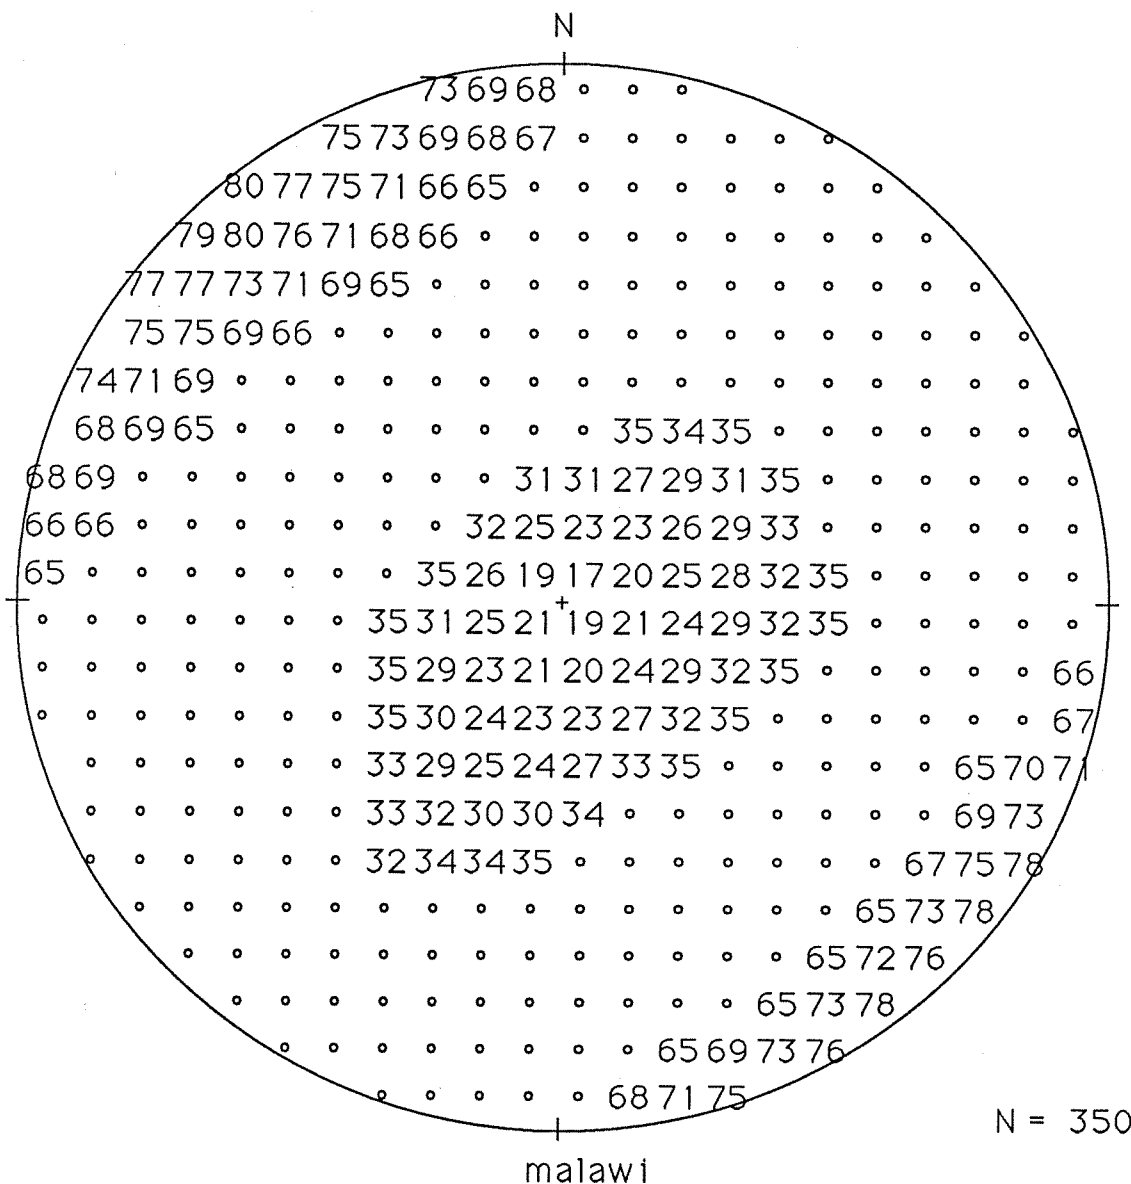

Supplementary data 92, for: Oblique extensional tectonics in the Malawi Rift, Africa

Christopher C. Sorlien, May 8, 1992 and July 27, 1992

The data used in "Oblique extensional tectonics in the Malawi Rift, Africa" follows. Measurements were made in March 1985 and analyzed manually that year using the right dihedral method of Angelier and Mechler (1977). The data were reanalyzed using the same method and a computer program in 1990 and 1991. The computed results are slightly different than the previous results for several reasons. The data analyzed by hand were weighted by confidence of the measurement, while all measurements for which sense was determined were weighted equally in the computed solution. Stations with many measurements were broken into two parts in the hand analysis by location within a station, while they were combined in the computed solution. The computed results were compared with the hand analysis; when computed results were somewhat ambiguous the quality of the individual measurements was taken into account in choosing the extension direction for figure 2.

The following measurements were made by Pierre-Yves Chenet and Luc Meffre of the Institut Francaise du Pétrole, and Jean Chorowicz and Sorlien. Measurements are often rounded to the nearest 5° before correction for magnetic deviation, which is valid since fault surfaces are not perfectly planar; however, these measurements should not be analyzed assuming more precision than 3 degrees. Measurements were made with the compass set on zero and then the magnetic deviation was added in later. The following measurements are corrected for magnetic deviation. Measurements are in this order: strike, dip direction, dip, pitch direction, pitch, and sense. r=reverse; n=normal; d=dextral; s=sinistral. If the striations are questionable I will add p=(?) or p=?. If they were particularly good and that was noted, then I will add p=!. No comment generally means that the striations are not questionable but are not spectacular either. The confidence of the sense determination is given in the following order from bad to good where noted. s=?; (?); app. (for apparent); prob (for probably); and sure or clear. For each station with more than 3 measurements, I will give my own qualitative judgement of the quality of the right dihedral solution from poor to excellent. This is not related to the confidence of individual measurements.

The stations were located onto geologic maps in the field, and latitude and longitude was later measured from these 1:100,000 and 1:250,000 scale maps; precision in most cases is 100 to a couple hundred meters. Most locations are on or near dirt or paved roads. Malawi is a tropical country with thick residual soils; there were almost no outcrops over a wide area of north central Malawi. A future study may want to concentrate on where

streams cross faults, and use a boat along the coast of Lake Malawi. Water erosion may keep up with weathering along escarpments.

Stations a and b-not used in figure 2, only 2 measurements each station.

83,"n",90,"e",0,"d"-prob  
 38,"nw",86,"ne",65,"n"s=?  
 90,"s",86,"e",75,"n"  
 83,"n",60,"e",55,"r"s=(?)  
 121,"ne",90 no striations  
 98,"s",85 no striations

station 1, inversion quality=fair

01,"w",88,"s",75,"n", p=?,s=?  
 66,"n",87,"e",84,"n" conjugate to previous, p=?,s=?  
 39,"se",83,"ne",58,"d",p=!  
 45,"nw",73,"ne",50,"d",p=!  
 01,"e",82,"n",10,"d", s=sure

station 2, inversion quality=very good

146,"ne",70,"se",83,"n" s=clear  
 102,"s",80,"e",55,"n" large fault 30 cm crushed zone, s=prob  
 42,"se",56,"sw",74,"n"  
 67,"s",76,"e",40,"n"  
 42,"se",70,"w",45,"n" p=?  
 42,"se",66,"ne",90,"n"  
 52,"se",80,"sw",37,"n"  
 42,"se",68,"sw",55,"n"  
 36,"se",62,"sw",70,"n"

station 3, no inversion

157,"e", 85,"n",7,"d" p=!, somewhat mineralized, s=?

station 4, no inversion

12,"e", 70,"n",40,"n" s=?

station 5, inversion quality fair-good

91,"n",80,"e",80,"n" open fault, p=?, s=(?)  
 56,"n",47,"w",78,"n" big fault, p=!

87,"n",85,"w",80,"n" s=?  
 101,"n",60,"w",10,"s"  
 111,"ne",70,"se",8,"s" s=prob  
 08,"w",36,"n",83,"n"  
 71,"n",80,"w",80,"n" p=?  
 33,"se",70,"ne",64,"n" s=clear  
 101,"s",60,"w",20,"s" s=sure  
 36,"se",70,"ne",67,"n" s=sure  
 36,"se",72,"ne",50,"n" s=prob  
 85,"s",65,"w",50,"n"  
 136,"ne",85,"nw",80,"n" p=mullions  
 106,"ne",75,"se",72,"n" p=? (mullions?)  
 111,"ne",87,"se",5,"s" p=(?) s=prob  
 93,"n",85,"w",75,"n" p=?  
 67,"n",80,"e",78,"n" p=?  
 99,"n",70,"e",71,"n" p=?  
 41,"nw",80,"sw",70 no sense determination  
 01,"e",75 no striations  
 91,"n",80 no striations

station 6, inversion quality=fair (WNW extension only slightly better than NNW)

109,"n",90,"e",85,"s" p=?, s=prob  
 94,"n",90,"e",90,"s" p=? s=prob  
 154,"e",82,"s",25,"d" older striations, s=clear  
 154,"e",82,"n",80,"n" same fault, younger striations  
 141,"ne",90,"nw",60,"s" p=?, s=prob  
 95,"n",90,"w",65,"s" p=?  
 83,"n",75,"w",83,"n" s=clear  
 82,"n",85,"w",86,"n" s=clear  
 74,"n",83,"w",80,"n" p=(?)  
 94,"n",80,"w",80,"n" s=clear  
 128,"ne",76,"se",84,"n" s=clear  
 22,"nw",75,"ne",30,"n" p=?

station 7, inversion quality very good

177,"e",85,"s",56,"n" s=clear  
 152,"e",80,"s",62,"n" s=clear  
 132,"ne",68,"se",90,"n" s=clear  
 122,"ne",80,"nw",80,"n" s=clear  
 17,"w",75,"n",65,"n" s=clear  
 172,"w",80,"n",60,"n" s=clear  
 119,"ne",70,"nw",70,"n" p=!

117,"ne",66,"nw",52,"s"  
 132,"ne",80,"nw",52,"n"  
 02,"w",82,"n",63,"n"  
 20,"e",85,"n",68 no sense  
 147,"e",75,"s",90 no sense  
 84,"s",80,"e",80 p=? no sense  
 12,"w",80,"s",32 no sense

station 8, inversion not used in fig 2 (less than 4 measurements)

42,"se",85,"sw",60,"n" s=clear  
 52,"se",70,"ne",65,"n"  
 144,"e",76,"n",25,"n" s=clear

station 9, inversion quality=excellent. 7 measurements did not have sense determination. Inversion was done both without them(N=18) and with them assumed normal (N=25). The azimuth of the least principal stress axis is the same either way. In figure 4, measurements for which sense was not determined are shown as normal.

50,"nw",84,"ne",64,"n"  
 21,"w",70,"s",15,"d" s=prob  
 165,"w",80,"s",5,"d" s=prob  
 131,"ne",90,"se",30,"s" p=!, s=prob  
 35,"nw",65,"ne",78,"n" s=sure  
 30,"nw",80,"ne",73,"n" s=sure  
 27,"nw",64,"ne",75,"n" s=sure  
 45,"nw",59,"ne",72,"n" s=prob  
 21,"nw",80,"ne",60,"n" s=sure  
 25,"nw",65,"ne",52,"n" s=sure  
 13,"w",68,"n",80,"n" s=sure  
 145,"ne",70,"se",30,"n" s=clear  
 170,"w",70,"n",82,"n" s=clear  
 175,"w",78,"n",80,"n" s=sure  
 118,"ne",85,"nw",72,"n" s=clear  
 130,"ne",55,"se",80,"s"  
 165,"e",90,"s",90,"d" pitch=+/- 5°  
 171,"e",88,"s",84,"n" s=clear

sense was not determined for the following measurements; assumed normal

21,"w",70,"s",60  
 95,"n",80,"e",45  
 155,"e",65,"s",80 p=?  
 160,"e",75,"s",30 p=!  
 150,"sw",78,"nw",78 p=!



110,"s",85,"e",30 p=!  
 119,"sw",82,"se",32

station 10, less than 4 measurements with sense determined

165,"e",60,"s",85,"n" s=prob

10,"w",62,"s",85,"n" s=clear

102,"n",56,"e",65,"n" s=clear

faults striking 41 and 32 (dip not measured) offset a quartz vein left laterally)

station 11, no striations so no inversion

the following have normal separations

165,"e",75

5,"e",75

25,"se",80

10,"e",70

15,"e",80

10,"e",80 normal sinistral separation

5,"e",80 normal sinistral separation

110,"s",60

13 measurements of extension fractures (open fractures) striking between 20 and 25 degrees, and 5 measures striking between 7 and 22 degrees.

station 12, inversion quality excellent

02,"w",60,"n",45,"n" p=!

12,"w",80,"n",72,"n" s=prob

16,"w",80,"n",70,"n" s=sure by 70 cm separation

167,"w",65,"n",40,"n" s=sure by 3 cm separation

167,"w",71,"n",30,"n" s=sure by separation

152,"w",75,"n",50,"n" s=sure by 50 cm separation

02,"w",75,"n",42,"n" s=sure by 40 cm separation

07,"w",60,"n",52,"n" s=clear

82,"n",40,"e",45,"s" s=?

22,"nw",57,"e",35,"n" s=clear by 10 cm separation

37,"nw",75,"sw",45,"n" s=app

40,"nw",90,"ne",25,"s" s=app

22,"se",83,"ne",30,"d" conjugate with next measure, s=prob

177,"w",80,"n",27,"n" s=clear

92,"s",55,"w",55,"s"

32,"nw",85,"ne",60,"d" s=clear by 1 cm separation

27,"nw",90,"ne",72,"d" s=clear

142,"ne",70,"se",15,"n" 2 sets striations, p=?, ? older

142,"ne",70,"se",80,"n" ? younger  
 02,"w",74,"n",40,"n" s=clear  
 117,"ne",68,"w",60,"n" s=sure  
 127,"ne",68,"nw",75,"n" s=sure  
 132,"ne",55,"se",55,"n"  
 147,"w",84,"n",70,"n" 2 sets striations, younger  
 147,"w",84,"se",0,"d" same fault, older  
 137,"w",85,"s",80,"n" 2 sets striations, younger  
 137,"w",85,"s",25,"n" same fault, older  
 107,"n",30 no striations, reverse separation  
 152,"w",20 no striations

station 13, inversion solution fair, WSW or WNW extension possible, WNW used accounting for confidence of measurements.

97,"s",80,"w",40,"s" s=prob  
 152,"e",55,"s",50,"n" s=clear  
 147,"e",80,"s",60,"n" p=? s=prob  
 102,"n",40,"w",75,"n" s=sure  
 17,"nw",80,"sw",70,"n" conjugate with the following measure, s=clear  
 117,"sw",86,"nw",65,"n" s=clear  
 82,"s",35,"w",14,"d" azimuth of striation converted to pitch on equal area net, s=app  
 42,"nw",90,"ne",80,"s" s=prob  
 42,"nw",55,"sw",86,"n" s=sure  
 37,"nw",60,"sw",85,"n" s=clear  
 67,"n",72,"e",0,"s" s=app  
 72,"n",80,"e",80,"r" s=sure  
 72,"s",85,"e",72,"n" s=sure  
 67,"n",80,"w",70,"n" s=app  
 47,"n",74,"ne",90,"n" s=app  
 122,"sw",85,"se",55,"d" s=prob  
 37,"nw",75,"sw",45,"n" s=prob  
 sense not determined for the following  
 22,"nw",60,"sw",30  
 117,"ne",70,"nw",6  
 122,"sw",66,"se",7

station 14, inversion quality is poor, not used in figure 2 for that reason. Extension between west and northwest is favored, and the manual solution of 1985 favors NW extension.

81,"s",65,"e",40,"s" s=clear  
 41,"nw",78,"ne",42,"s" p=?, s=prob by separation  
 61,"n",90,"e",40,"s" s=prob by separation

138,"ne",50,"nw",68,"d" s=clear by 5 cm separation  
 166,"e",20,"n",25,"s" p=?, s by separation on parallel fault 10 cm away  
 51,"nw",82,"e",65,"n" s=app  
 16,"w",78,"n",0,"d" s=app  
 71,"s",82,"e",5,"s" s=prob  
 51,"nw",78,"e",55,"n" p=(?)  
 46,"se",78,"sw",25,"n" p=!, s=clear by 3 cm separation  
 56,"s",84,"w",10,"s" s=clear by separation  
 51,"se",70,"ne",65,"n" p=(?), s=clear by 20 cm separation

station 15, inversion solution fair, it is uncertain whether first 10 measurement were on in-place outcrop

49,"se",75,"ne",75,"n" s=app  
 74,"s",50,"e",90,"n"  
 66,"s",50,"e",90,"n" s=sure  
 31,"se",46,"ne",60,"n" s=sure  
 51,"se",50,"ne",30,"n" s=prob  
 36,"nw",40,"ne",45,"n"  
 36,"se",38,"ne",50,"n" s=sure  
 16,"e",75,"ne",45,"n" s=prob  
 76,"n",42,"e",90,"n" s=app  
 16,"e",60,"n",5,"d" s=prob  
 06,"e",75,"n",57,"d" p=!, s=sure  
 01,"e",80,"n",55,"d" s=sure  
 146,"e",87,"n",40,"s" s=sure  
 121,"ne",60,"se",65,"n" s=(?)  
 14,"w",65,"n",40,"r" s=sure  
 91,"n",50,"e",70,"n" s=prob  
 176,"e",83,"n",60,"r" s=sure  
 156,"e",80,"n",85,"n" p=(?), s=prob  
 146,"sw",24,"se",62 no sense, azimuth striation converted to pitch assuming normal (not used in inversion).

station 16, no inversion since only 2 measures

101,"s",80,"w",10,"s" s=sure  
 31,"nw",84,"s",52,"n" p=(?), s=sure

station 17, no inversion since only 2 measures

80,"n",85,"e",45,"s" p=!, s=prob  
 37,"se",54,"sw",70,"n" s=sure

station 18, fair to good since extension not tightly constrained

01,"w",65,"n",30,"n" s=sure by 2 cm separation

16,"w",58,"s",60,"n" s=sure  
 16,"w",55,"ne",90,"n" s=sure  
 161,"w",62,"n",5,"d" s=sure  
 166,"e",90,"s",40,"d" s=sure

The following measure at first did not have sense determined, and then we went back to it and it was s=prob normal dextral. I missed this notation, and did not use this measurement in the inversion, but it could be used. It is compatible with NW extension, but does not constrain the solution further.

166,"w",75,"n",36,"d" s=prob

station 19, inversion quality fair-good since many slip directions are subparallel and therefore do not tightly constrain the extension direction

107,"s",50,"e",25,"s"  
 87,"s",60,"e",35,"s"  
 67,"s",60,"e",25,"s"  
 82,"s",55,"e",20,"s"  
 57,"s",76,"e",10,"s"  
 97,"s",50,"e",15,"s"  
 84,"s",70,"e",4,"s" s=sure  
 167,"e",67,"s",0,"s" s=prob  
 72,"s",73,"e",0,"s" s=sure, 2 sets striations, older  
 72,"s",73,"w",20,"s" s=prob, younger  
 92,"s",85,"w",8,"s"  
 82,"s",65,"e",0,"s" 2 sets striations, relative age not determined  
 82,"s",65,"w",30,"s" same fault, s=prob  
 82,"s",60,"e",15,"s" s=clear  
 57,"se",88,"ne",0,"s"

The following two measurements were used and are conjugate, but are suspect because the striations are in clay and may have been formed during road construction or by a loose block sliding under gravity

177,"w",82,"s",55,"n" p=?  
 107,"s",60,"w",85,"n" p=?  
 127,"ne",90+/-10 no striations, 5 cm dextral offset of subvertical quartz vein

station 20, inversion quality fair-good (few measures)

02,"e",80,"s",8,"n" p=?, s=?  
 52,"n",75,"sw",80,"n" p=?  
 177,"e",72,"n",50,"d" p=!, s=prob  
 82,"s",58,"w",75,"n" p=!, s=prob

station 21, 1 measure, no inversion

113,"ne",80,"se",80,"n" s=app

station 22, 1 measure, no inversion

103,"n",90,"s",25,"s" s=app

station 23, inversion quality good- quality excellent if 3 measures associated with NW extension removed.

99,"n",60,"e",30,"s"

114,"s",88,"e",40,"s" p=!

94,"n",67,"e",30,"d" s=app

54,"n",80,"e",40,"n"

54,"nw",90,"ne",40,"s" s=?

94,"n",58,"e",30,"d" s=prob

124,"ne",80,"se",55,"n"

109,"n",76,"e",10,"d" s=sure

104,"n",60,"e",40,"d"

109,"n",76,"e",35,"d" s=sure

64,"s",84,"e",45,"d" s=prob

54,"nw",78,"ne",40,"n" s=prob

69,"n",80,"e",55,"d" s=prob

60,"nw",77,"e",54,"d"

114,"ne",67,"e",50,"n" s=sure

74,"n",84,"e",50,"n"

74,"s",86,"e",45 no sense

station 24, not used in figure 2 since only 3 measures

04,"e",55,"s",40,"n" s=clear

39,"se",55,"sw",50,"n" s=clear

179,"e",73,"s",65,"n"

station 25, inversion quality fair-good (extension only at 82%).

24,"e",82,"s",40,"d" s=prob

14,"w",77,"n",0,"d" s=prob

119,"sw",72,"se",65,"n" s=prob

114,"s",76,"e",80,"n" p=?,s=app

30,"nw",74,"ne",10,"d" s=sure

66,"nw",50,"ne",83,"n" s=?(mullions), s=app

164,"w",80,"n",20,"s" s=app

104,"s",65,"e",30,"n" s=sure

129,"ne",68,"se",20,"s" s=app

84,"s",48,"w",80,"n"

174,"e",70,"s",30,"d" s=app

119,"ne",75,"se",63,"d" p=!,s=app

24,"se",74,"sw",65,"n" p=!, s=sure  
 106,"s",72,"e",10,"d" p=!, s=clear  
 124,"ne",90,"se",16,"d"  
 174,"e",85,"s",5,"s" s=app  
 119,"sw",85,"se",30,"s" s=?  
 19,"se",85,"sw",10 p=?, no sense

station 26, inversion quality fair, not used in figure 2 due to fair quality and few measures. Also, I made a mistake on 1 fault in 1985 and had NW extension with 1 additional incompatible fault in the hand solution. Not using this station favoring NE-extension in this paper is balanced by not using station 14, which favors NW extension.

09,"e",88,"s",10,"s"  
 29,"nw",78,"sw",72,"n"  
 139,"sw",78,"se",77,"n" s=app  
 154,"w",88,"se",75,"n" s=sure  
 19,"e",86,"s",76,"n" p=!, s=sure  
 89,"s",73,"e",83,"n" s=prob

station 27, inversion quality good, large diameter inversion=more grid points results in ESE extension instead of SE.

31,"nw",60,"sw",75,"n" s=sure, 2 m separation  
 131,"sw",20,"se",5,"n" converted from azimuth 133 to pitch se 5  
 11,"w",38,"n",58,"n" s=sure  
 34,"nw",22,"ne",83,"n" converted from azimuth 131 to pitch NE 83  
 71,"n",74,"w",70,"n" s=sure  
 171,"w",26,"n",60,"n" s=sure  
 34,"se",83,"sw",70,"n" large fault, p= (?)  
 11,"e",80,"n",80,"n"  
 26,"e",82,"n",70,"n"  
 31,"e",86,"n",45,"n"  
 31,"nw",84,"sw",70,"n" p=!  
 61,"n",55,"sw",58,"n"  
 36,"nw",78,"sw",80,"n"  
 156,"w",55,"s",90,"n"  
 136,"sw",55,"nw",75,"n"  
 26,"e",80,"s",68,"n"  
 36,"nw",58,"sw",75,"n"  
 66,"se",86,"sw",70,"n"  
 18,"w",68,"n",80,"n"  
 116,"ne",90,"se",25,"s" p=(?)  
 86,"n",8 Karroo bedding

station 28, inversion quality good but direction not tightly constrained

136,"w",85,"nw",48,"n"

121,"sw",50,"nw",72,"n"

151,"e",70,"se",90,"n"

91,"s",45,"w",49,"n" striation azimuth 45 converted to pitch west 49

111,"n",55,"w",75,"n" p=?, s=sure by 2.5 m separation

81,"s",70,"e",80 p=?, no sense determined

station 29, inversion quality excellent

111,"n",56,"nw",50,"n" s=sure

36,"nw",62,"ne",75,"n" p=!, s=prob

46,"nw",80,"ne",90,"n"

56,"nw",86,"ne",75,"n"

106,"n",52,"nw",47,"n"

61,"nw",75,"ne",75,"n"

61,"s",55,"w",82,"n"

54,"se",45,"ne",71,"n" p=!, s=clear

111,"n",35,"w",33,"n" s=sure, converted from azimuth 141 to pitch W33

91,"n",70,"w",80,"n" p=(?)

46,"nw",56,"ne",76,"n" s=sure

11,"w",80,"n",73,"n" s=sure

58,"nw",72,"ne",76,"n"

66,"s",66,"ne",37,"n"

94,"n",33,"e",88,"n" p=!, converted from azimuth 06 to pitch E88

81,"n",31,"e",85,"n"

136,"sw",84,"se",30,"s" s=clear, two sets striations, older

136,"sw",84,"nw",35,"d" s=clear, same fault, younger

111,"n",84,"w",30,"s" s=app

126,"sw",80,"se",27,"s" s=prob, two sets striations, older

126,"sw",80,"nw",45,"d" s=prob, same fault, younger

26,"nw",82,"sw",20,"d" s=?

21,"se",70,"n",45 no sense determined

station 30, not in figure 2 since only 2 measures

38,"nw",90,"ne",50,"d"

56,"nw",65,"sw",5,"d" s=sure

station 31, inversion quality good

90,"n",70,"w",55,"n" p=?, s=sure by 20 cm separation

80,"n",86,"w",65,"n" p=?, s=sure by 5 cm separation

10,"w",77,"s",45,"n" p=(?), s=app

30,"se",78,"n",30,"n" p=?, s=app

120,"n",40,"nw",32,"n" azimuth 145 converted to pitch NW32

100,"n",20,"w",65,"n" azimuth 165 converted to pitch W65  
 105,"n",30,"w",35,"n" azimuth 135 converted to pitch W35  
 25,"e",70,"s",75,"n" s=prob  
 135,"ne",72,"se",90,"n" p=!, s=sure  
 125,"ne",57,"nw",65,"n" p=!, s=sure  
 95,"n",49,"w",60,"n" p=!, s=sure  
 75,"n",54,"e",90,"n" p=!, s=sure  
 50,"nw",86,"ne",50,"d" p=?, s=app  
 55,"se",87,"ne",80,"n" p=(?), s=sure  
 85,"n",73,"e",85,"n" p=!, two sets striations, younger  
 85,"n",73,"w",10,"s" p=(?), same faults, older  
 15,"w",68,"n",73,"n" p=!, s=sure

station 32, not in figure 2 since only 3 measurements

60,"nw",80,"sw",45,"n"  
 45,"nw",62,"sw",50,"n" p=?, s=app  
 50,"nw",80,"sw",80,"n"

station 33, inversion quality very good

111,"s",65,"w",45,"d" s=app  
 06,"e",80,"s",75,"n" s=sure, 2 sets striations, no relative age  
 06,"e",80,"n",80,"n" s=sure, same fault  
 116,"s",72,"se",45,"n" p=!, s=app  
 116,"n",80,"w",65,"n" p=!, s=sure  
 116,"n",62,"w",60,"n" p=!, s=sure  
 126,"ne",67,"w",85,"n"  
 9,"w",77,"ne",40,"n"  
 46,"s",50,"sw",35,"d" s=app  
 161,"w",70,"s",36,"r" s=sure  
 116,"s",82,"nw",66,"n" p=!, s=app  
 26,"nw",64,"n",80,"n" p=(?)  
 121,"sw",75,"se",15,"s" p=(?)

station 34, inversion quality very good, measurements in different outcrops a couple km apart (will give detail when I do locations later).

111,"n",82,"e",0,"s" s=sure  
 01,"e",72,"s",82,"n" s=sure  
 101,"n",65,"w",80,"n" p=!, s=sure  
 58,"se",53,"ne",48,"n" s=app  
 54,"se",63,"ne",55,"n" s=app  
 56,"nw",90,"ne",62,"d"  
 01,"w",88,"n",5,"d" p=!, s=app  
 26,"nw",90,"ne",12,"d" s=app



61,"se",84,"sw",70,"r" s=prob  
 74,"s",73,"e",73,"n" p=!, s=sure  
 56,"se",82,"sw",25,"s" s=app  
 141,"sw",85,"se",40,"d"  
 166,"e",80,"s",38,"d" s=sure  
 21,"w",15,"s",17,"d" clear by separation, azimuth 36 converted to pitch  
 S17

station 35, solution quality very good

34,"nw",79,"sw",15,"d" s=prob  
 29,"e",72,"n",55,"n" p=?, s=app  
 64,"n",90,"e",52,"s"  
 139,"ne",53,"se",52,"n"  
 94,"n",55,"w",45,"n" p=!

station 36, inversion quality good

154,"e",80,"s",75,"n" p=!, s=sure  
 114,"ne",64,"nw",70,"n" s=prob  
 89,"n",70,"w",70,"n"  
 59,"n",78,"w",80,"n" p=?, s=app  
 54,"se",50,"ne",10,"d" s=app  
 64,"n",78,"w",72,"n" s=app  
 59,"nw",50,"ne",90,"n" p=(?), s=sure  
 79,"n",48,"e",35,"d" p=!, s=sure  
 149,"w",72,"n",40,"d" p=?, s=app  
 149,"w",60,"n",75,"n" p=?  
 54,"nw",77,"sw",5,"s" s=prob  
 164,"w",72,"n",80,"n" p=!  
 164,"w",66,"n",65,"n" p=!  
 64,"n",65,"e",80,"n" p=!

mwextra: single isolated measurements not given station numbers. All but the first one were used in the whole Malawi (N=350) inversion and figure 5.

129,"sw",73,"se",5,"s" p=?, s=prob  
 74,"n",53,"w",80,"n"  
 129,"ne",80,"se",90,"n"  
 114,"s",77,"w",30,"s" s=app  
 09,"w",84,"n",80,"n"

Station 1;  $15^{\circ} 20.69' S$ ,  $35^{\circ} 14.28' E$  along dirt road.  
 Station 2;  $15^{\circ} 57.36' S$ ,  $34^{\circ} 54.32' E$  in bend of main paved road.  
 Station 3;  $15^{\circ} 6.47' S$ ,  $35^{\circ} 22.46' E$  single measure on dirt road.  
 Station 4;  $15^{\circ} 2.76' S$ ,  $35^{\circ} 24.41' E$  on road at low but distinct Makongwa scarp  
 Station 5a;  $15^{\circ} 10.60' S$ ;  $35^{\circ} 17.40' E$  big roadcut near Kasupe, main road  
 Station 5b;  $15^{\circ} 10.52' S$ ;  $35^{\circ} 19.26' E$  main road  
 Station 6;  $14^{\circ} 26.07' S$ ,  $35^{\circ} 21.49' E$  on road measuring up and SE from fault.  
 Station 7;  $14^{\circ} 25.59' S$ ;  $34^{\circ} 33' E$  where paved road crosses distinct scarp  
 Station 8a measures 1 and 2;  $14^{\circ} 42.83' S$ ,  $34^{\circ} 47.06' E$  odometer=121.4 km  
 Station 8b measure 3;  $14^{\circ} 44.99' S$ ,  $34^{\circ} 47.84' E$ -8a and 8b both where streams cut distinct low scarp west of paved road. odometer=126-"T" intersection at Bilila=136.0  
 Station 9;  $13^{\circ} 13.27' S$ ,  $34^{\circ} 18.46' E$ , measures are close to base of distinct west facing scarp where main road crosses it (road cut)- more measures could be made further away from base of scarp.  
 Station 10;  $12^{\circ} 58.24' S$ ,  $34^{\circ} 13.05' E$  on dirt road about 300 m SE of pond  
 Station 11;  $12^{\circ} 57.01' S$ ,  $34^{\circ} 16.08' E$  same dirt road as 10.  
 Station 12;  $15^{\circ} 57.88' S$ ,  $34^{\circ} 54.07' E$  on main road- starts 1.3 km south of station 2 and proceeds 1.4 km further south along road.  
 Station 13;  $16^{\circ} 1.99' S$ ,  $34^{\circ} 51.34' E$ - on main road, starts at base of escarpment about 50 m above a barrier in road- proceeds a few hundred m uphill (to N).  
 Station 14;  $16^{\circ} 18.47' S$ ,  $35^{\circ} 3.84' E$ -Chakanza-Muono Fault-in open area north of dirt road.  
 Station 15;  $16^{\circ} 5.90' S$ ,  $34^{\circ} 39.91' E$ , measures 1-10 on small outcrop along road just before base of Mwanza scarp, 11-19 in stream bed a few m above where road crosses stream near the base of the scarp.  
 Station 16;  $15^{\circ} 52.67' S$ ,  $34^{\circ} 24.02' E$ - measure 1 up a stream, measure 2 on cut of dirt road.  
 Station 17;  $15^{\circ} 37.59' S$ ,  $34^{\circ} 34.29' E$ -hard rock outcrop on main(dirt) road 5 km east of Mwanza.  
 Station 18;  $15^{\circ} 2.84' S$ ,  $34^{\circ} 48.48' E$ - in stream at Sikulamowa Fault just south of road.  
 Station 19;  $14^{\circ} 52.08' S$ ,  $34^{\circ} 44.54' E$ , on main road 16.5 km east of Ntcheu Mobil station-roadcut with especially clear striations.  
 Station 20;  $14^{\circ} 47.30' S$ ,  $34^{\circ} 35.64' E$  roadcut on main road.  
 Stations 21 and 22-single measures on Lillongwe-Salima road-by odometer  
 Station 21 is at 744.5 or 6.5 km east of Mvera; 746.6 is railroad, 758.9 is Chitala Road, 760.7 is railroad, Station 22 is at a scarp at 763.2 km, 772.5 is a main intersection-Salima-Lillongwe Nkhotakhota.

Station 23; 13° 25.09' S, 34° 15.0' E, odometer=819.2 km=46.7 km north of intersection-good striations on roadcut-other roadcuts available to north, but no mapped faults here.

Station 24; 11° 46.12' S, 34° 11.93' E-at 205.4 km, Chinteché at 198.0, river at 205.9-at small quarry-quartzite-this is the middle of a large area of deep weathering-few outcrops and no striations in this region

Station 25; 11° 36.55' S, 34° 18.25' E, measures 1-5 about 500 m south of Nkhata Bay on dirt road, measures 6-18 reached by boat about 1 km to the south-quartzite outcrop.

Station 26; 11° 01.73' S, 33° 54.30' E, roadcut east of bridge on N side river.

Station 27; did not have a copy of the map on which we originally located stations 27, 28, and 34, and the new paved road is not on the geologic map. Station 27=10° 43' S, 34° 9' E roadcut on main new road 7.8 km above the Chiweta intersection.

Station 28; 10° 32.2' S, 34° 12.5' E- roadcut 8.7 km north of intersection with Livingstonia Road.

Station 29; 10° 35.66' S, 34° 08.57' E, location in middle of switchbacks on escarpment- measured from switchback 1 (top) through switchback 11

Station 30; measure 1 on coast 10° 25.80' S, 34° 15.37' E. Measure 2 is in a quarry about 1 km to SE.

Station 31; 4 locations along dirt road measure 1 and 2, odometer=960.3 km, bridge=960.7, measures 3-12=961.7 km, 13-15=962.4 km, narrowest point in valley = 963.1, measure 16=963.5 Zaninge grocery=964.0, bridge=965.5

1,2=9° 57.21' S, 33° 47.83' E; 3-12=9° 56.55' S, 33° 47.41' E; 13-15=9° 56.08' S, 33° 47.24' E; 16=9° 55.84' S, 33° 46.78' E

Station 32; 9° 54.84' S, 33° 41.12' E, at high point in road and 983.0 km

Station 33; 9° 43.89' S, 33° 53.11' E, road to Tanzania, measures 1-3 at 063.1 km, measures 4-12 at 64.5 km (lat-long)(heading SW), Kaporo intersection and 90° bend in road at 067.8 km, immigration control at 070.8 km

Station 34 is at several outcrops along 6 km of new road along the South Rukuru river-travelling to south:

Measures 1-3 at 223.7 km; 4-5 at 224.8; bridge over river at 225.1; 6-11 at 227.3; 12-14 at 229.5 km, intersection Muhuju-Karonga-Mzuzu at 244.0

Station 35; 1-3 at 11° 0.88' S, 33° 59.65' E; 4 and 5 in stream at 11° 0.35' S, 34° 01.75' E.-along dirt road to Mpompa

Station 36; 12° 28.43' S, 33° 31.44' E, about 1 km south of intersection with Mabulabo Road on the main paved road- at a roadcut of weathered rock at base of escarpment.

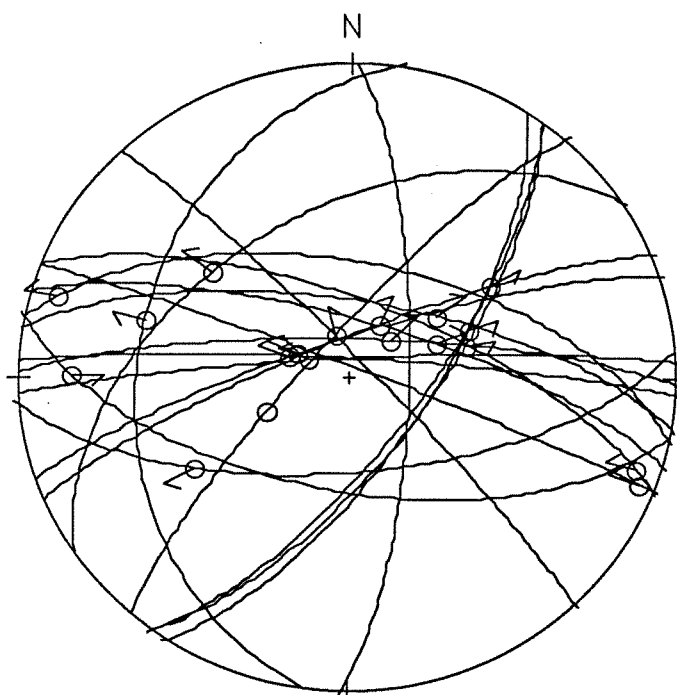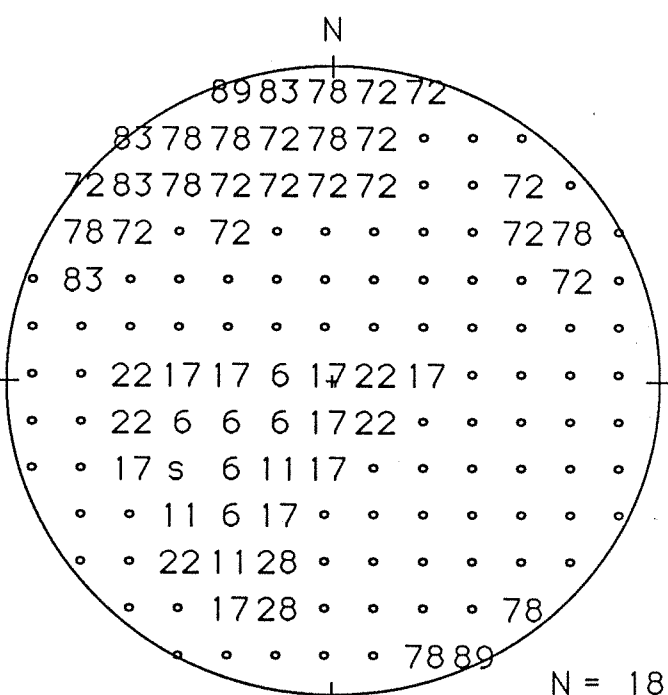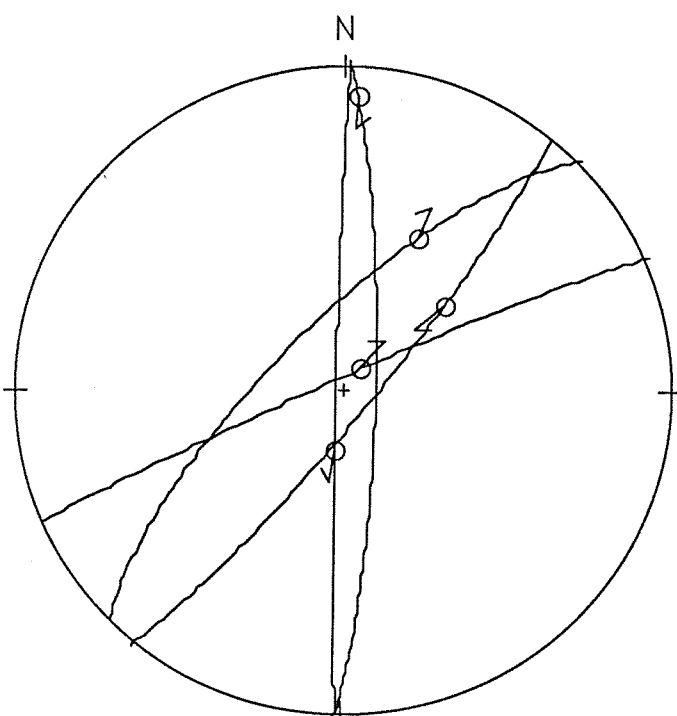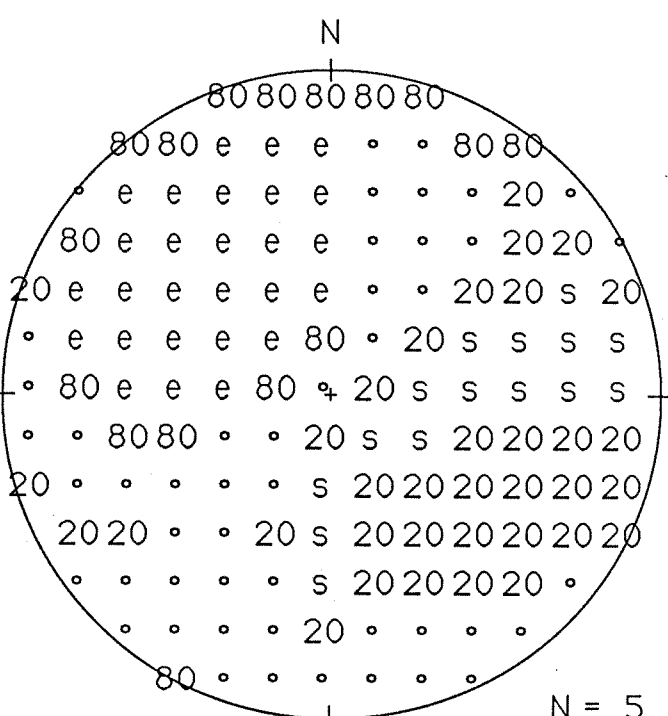



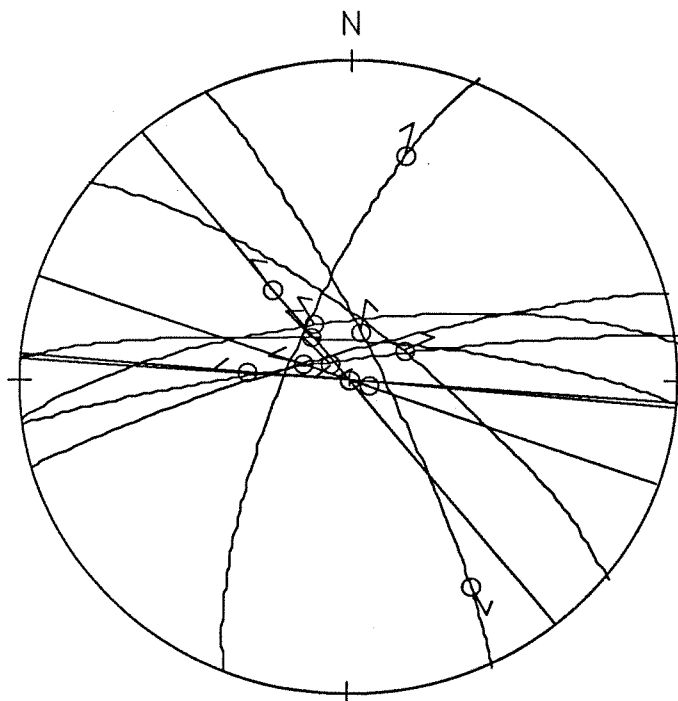

mw6

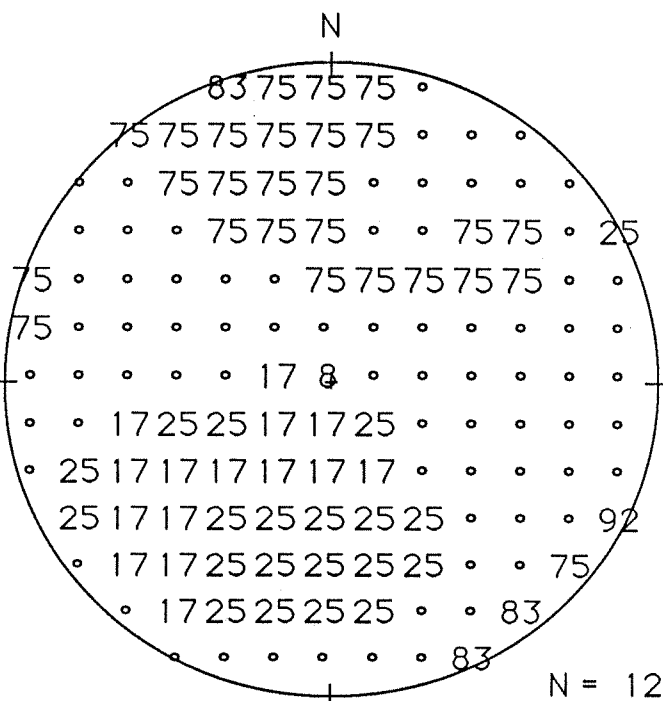

mw6

N = 12

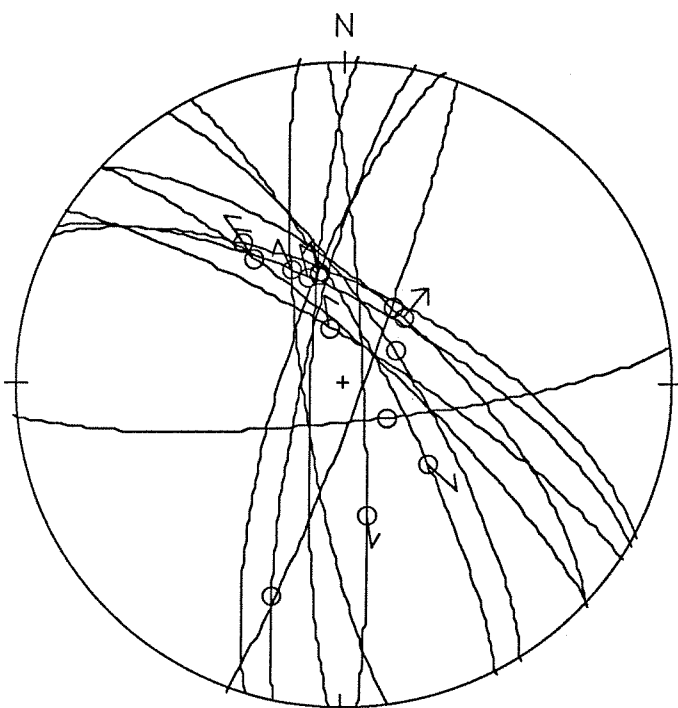

mw7

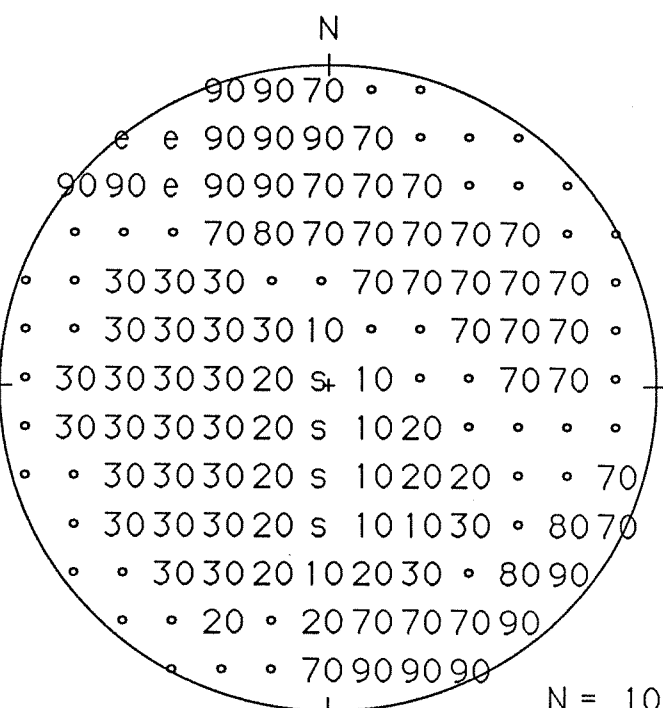

mw7

N = 10

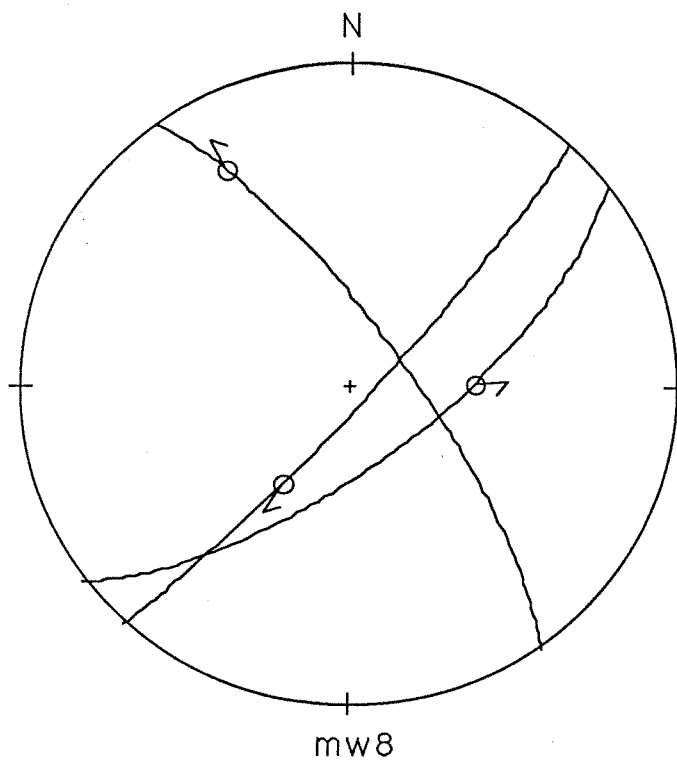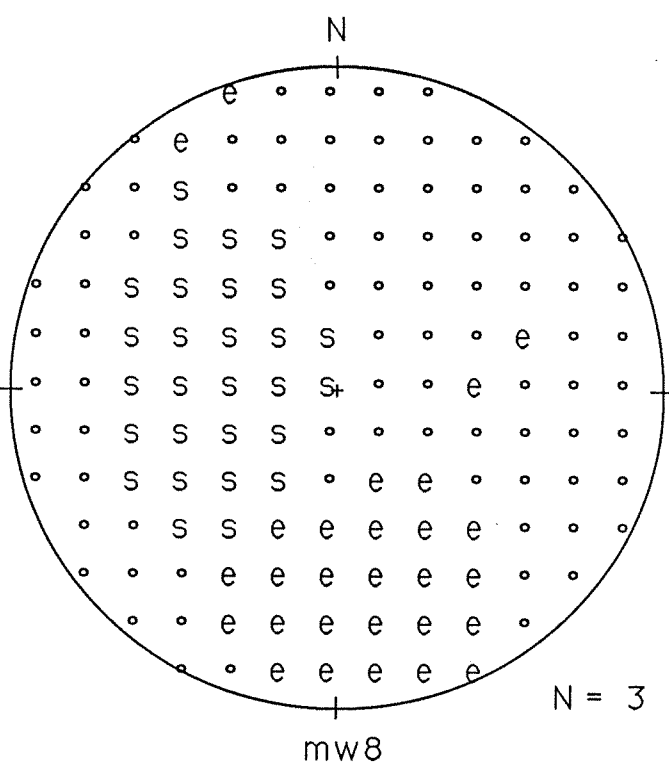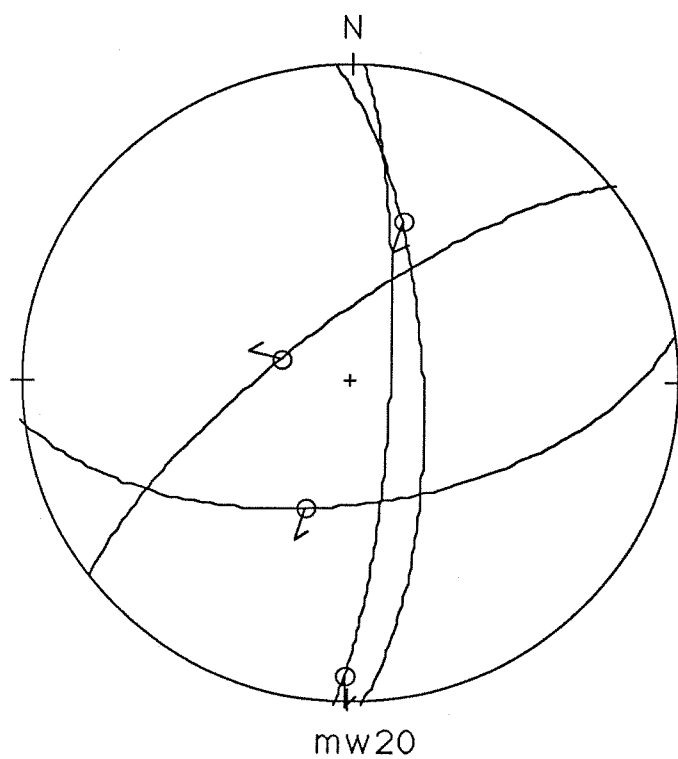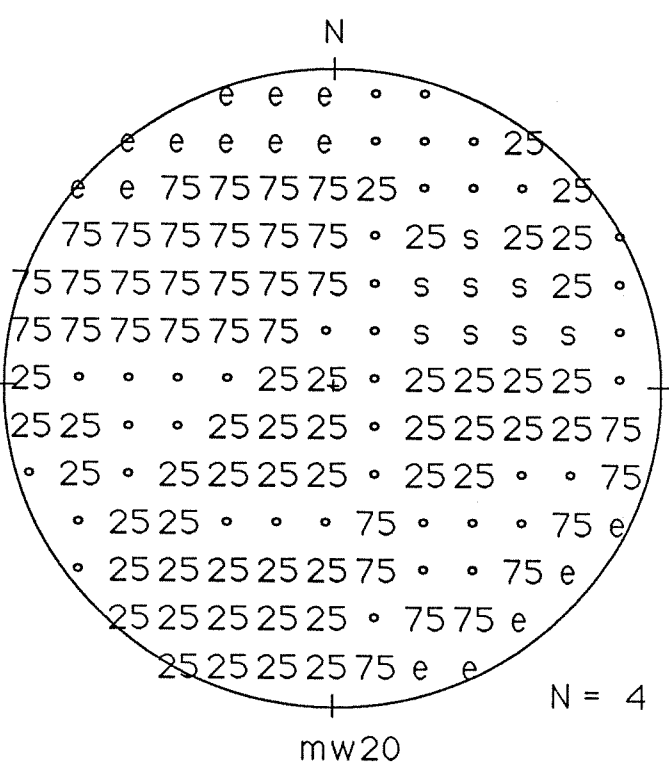

7 faults for which sense was not determined assumed to be normal

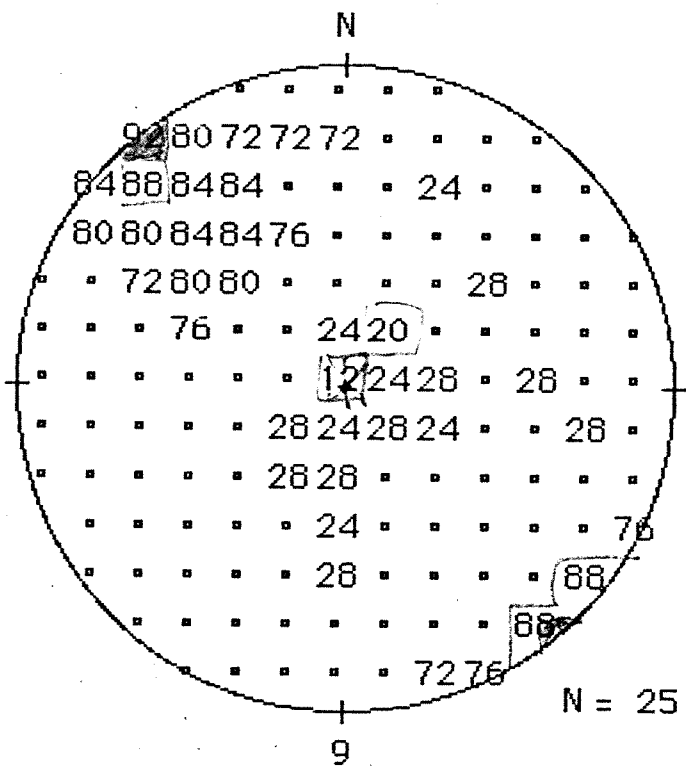



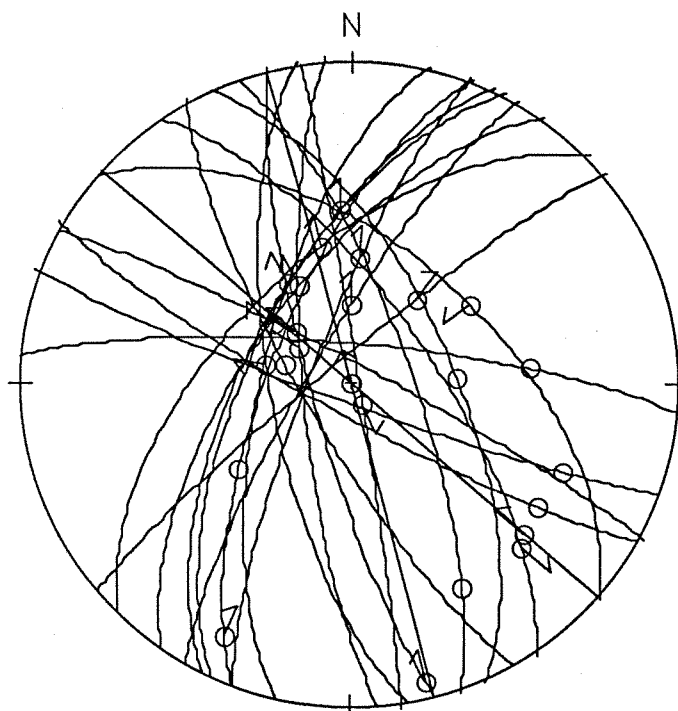

mw9

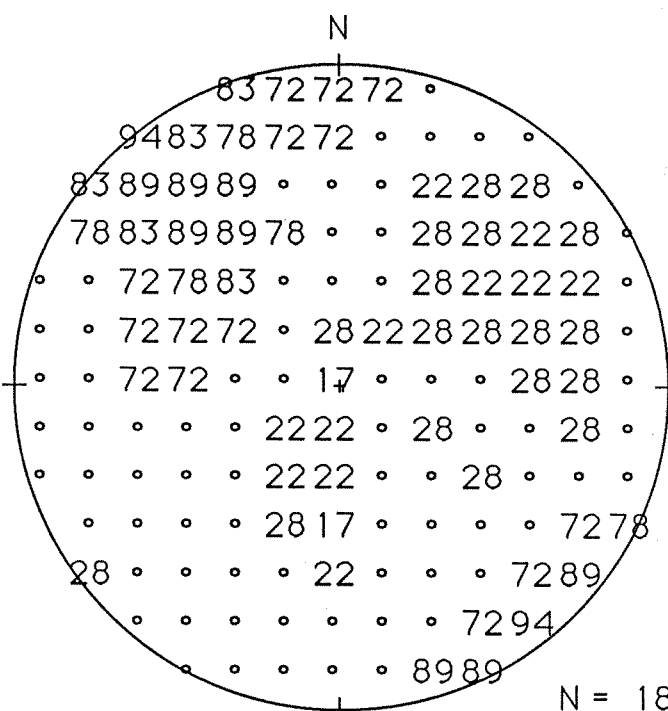

N = 18

mw9

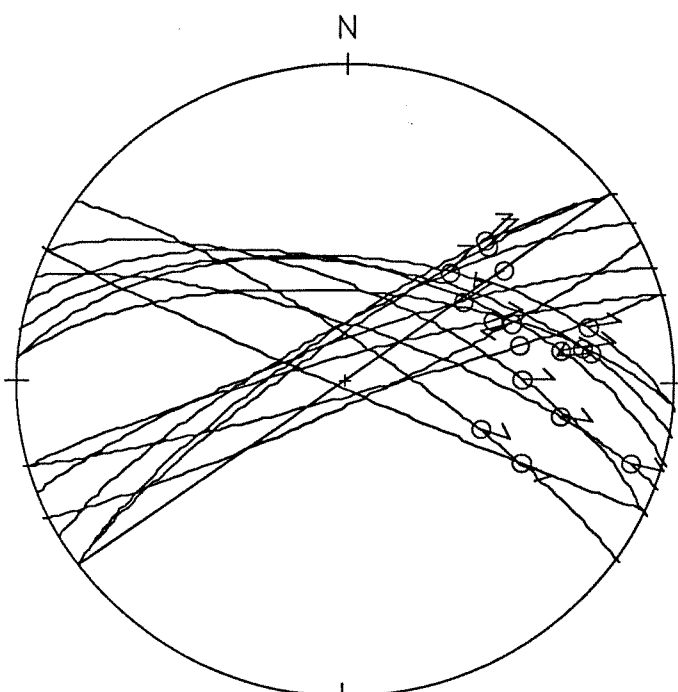

mw23

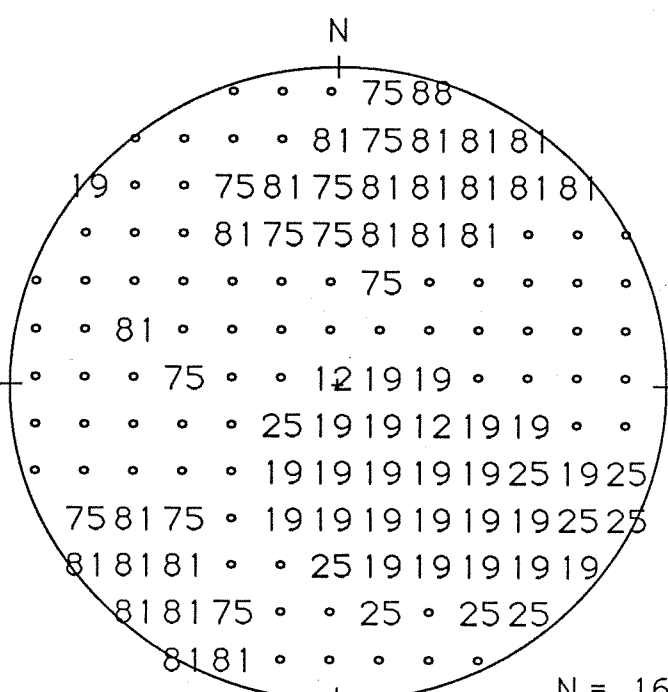

N = 16

mw23

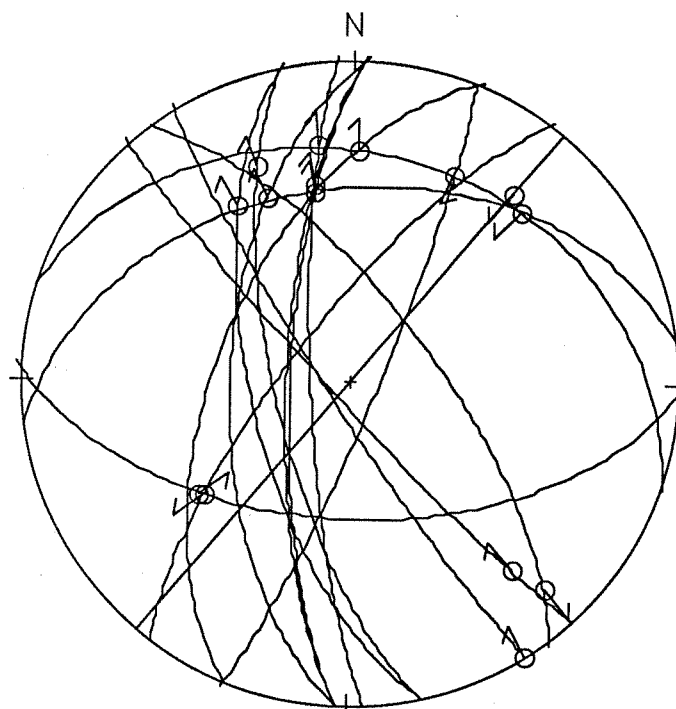

MW12A

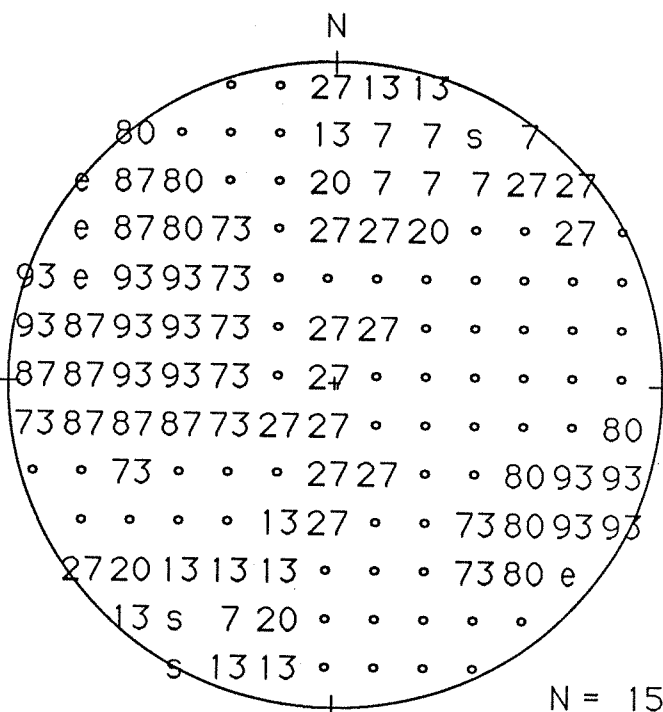

MW12A

$$N = 15$$
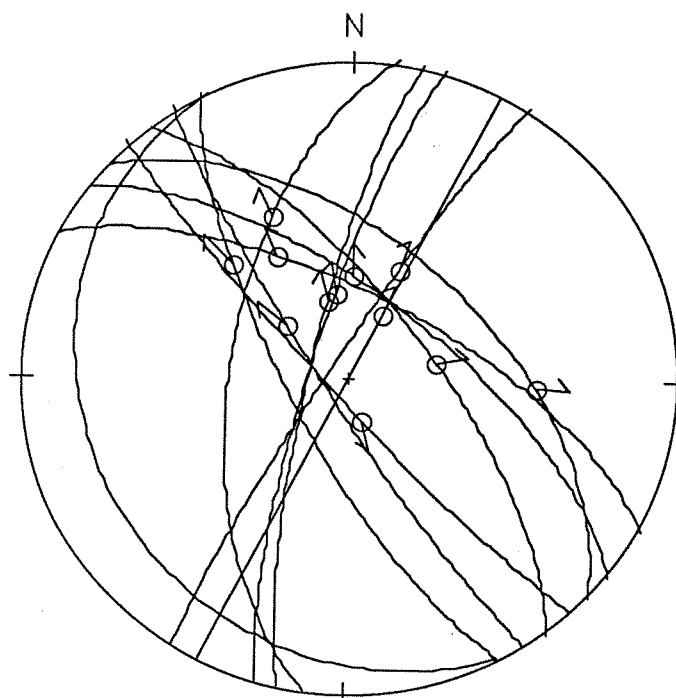

MW 12B

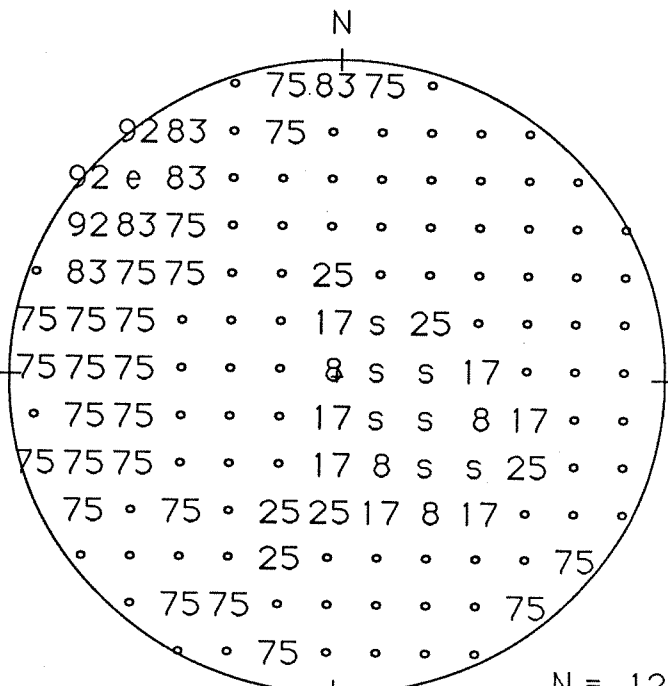

MW 12B

$$N = 12$$

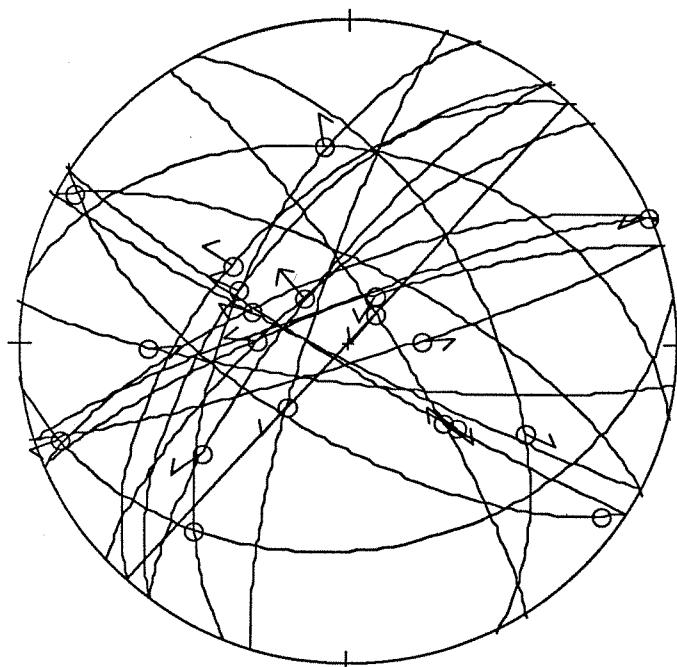

mw 13

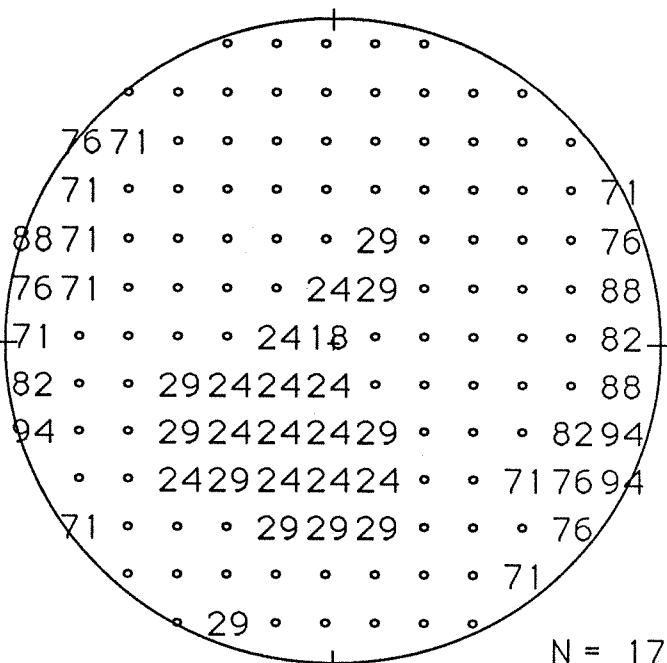

mw 13

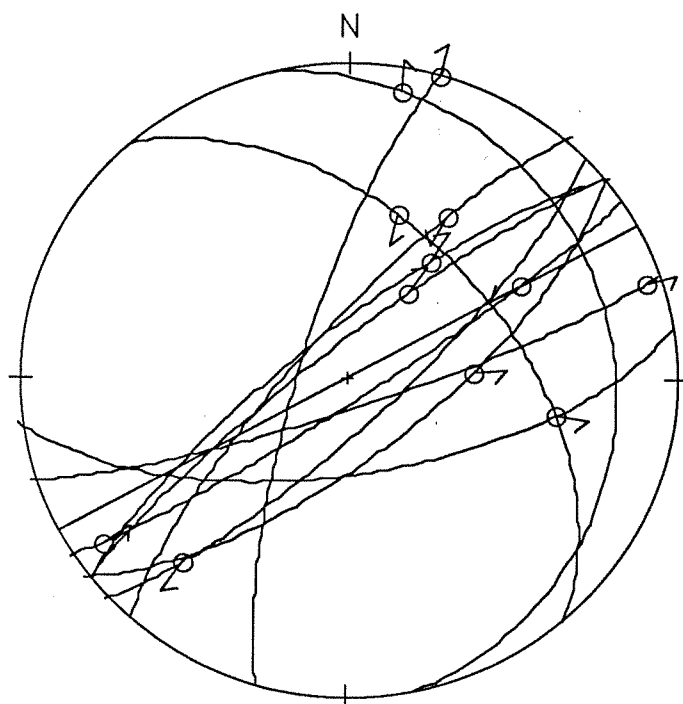

mw 14

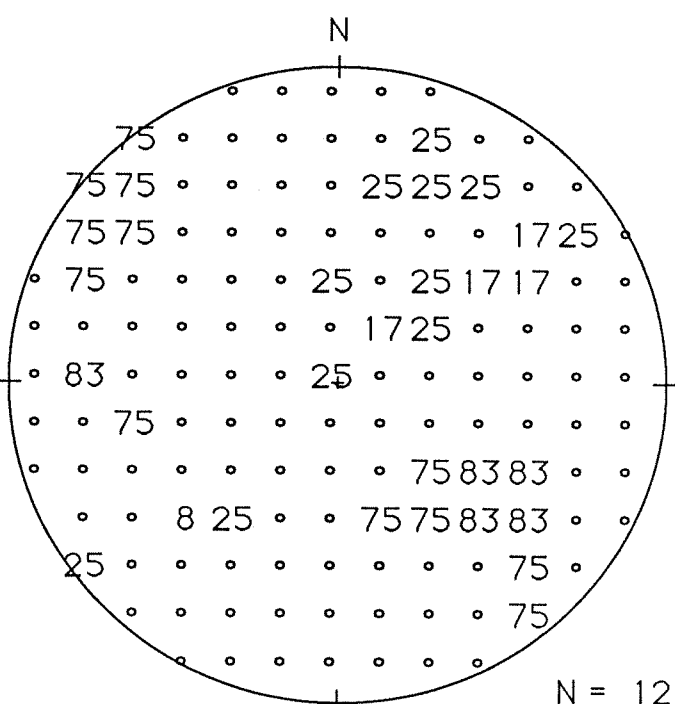

mw 14

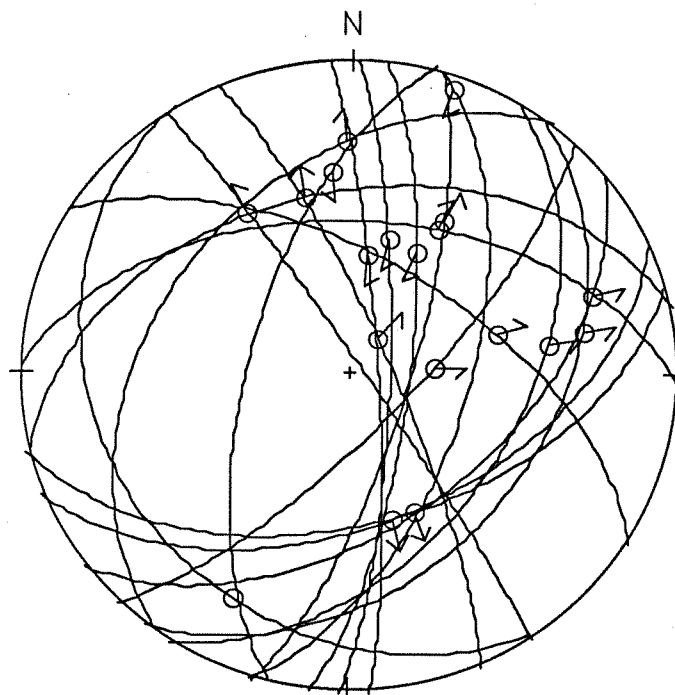

mw15

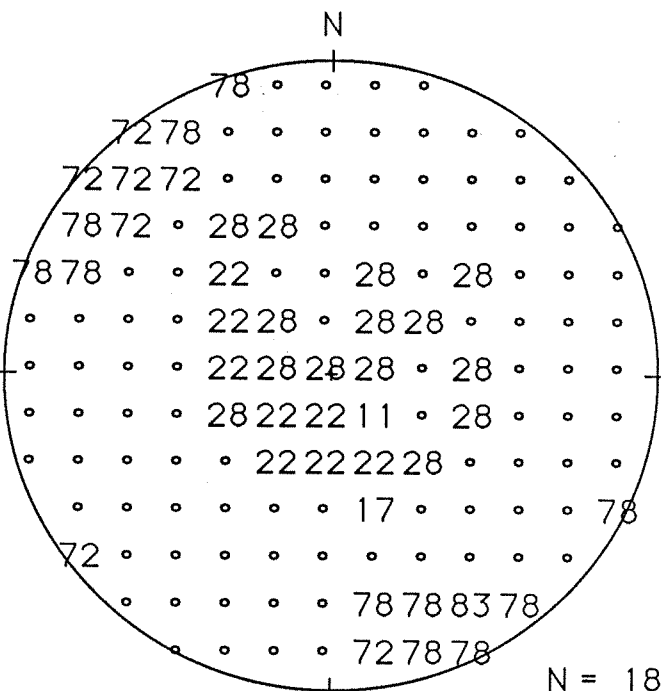

mw15

N = 18

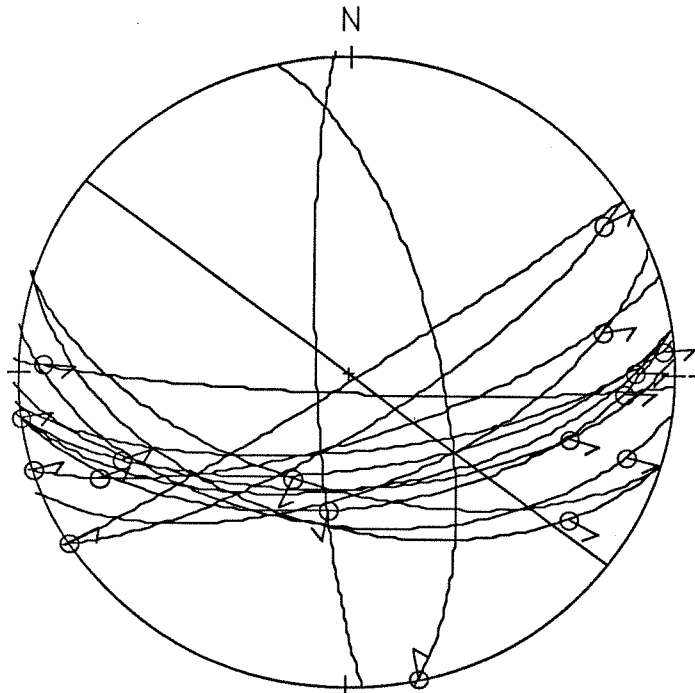

mw19

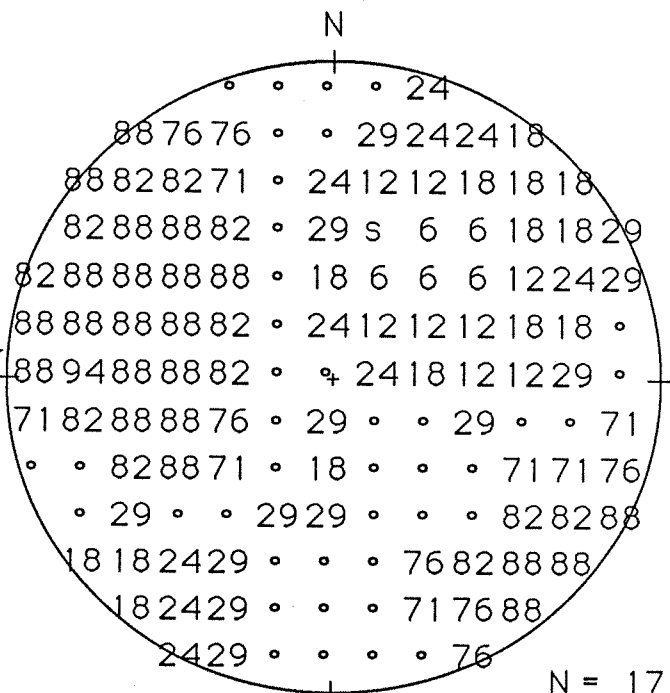

N = 17

mw19

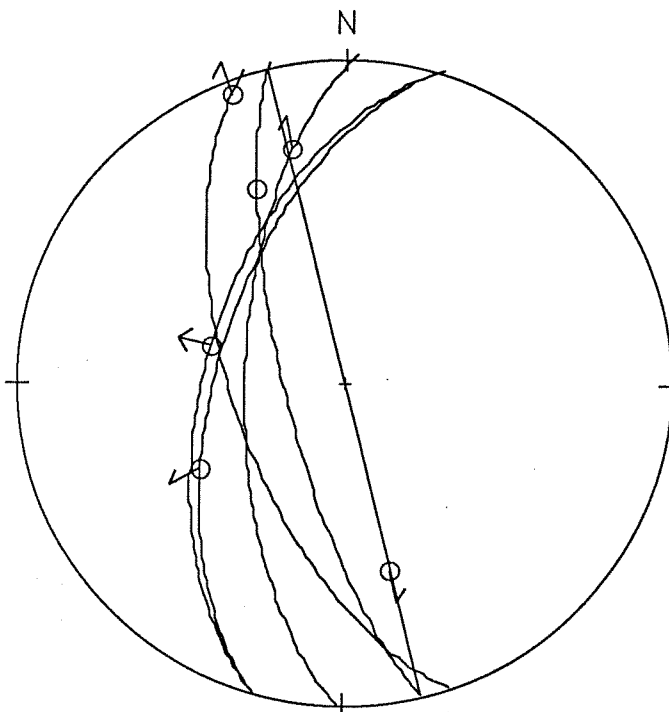

mw18

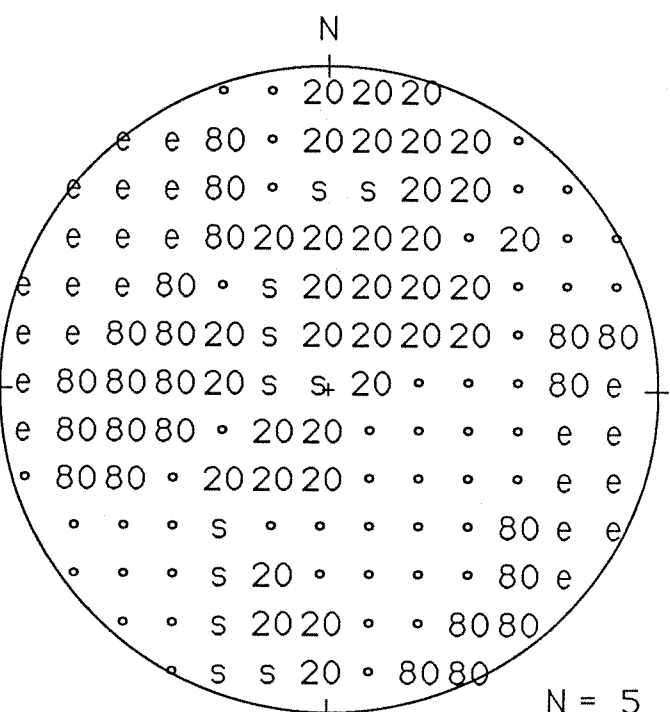

N = 5

mw18

3 incompatible  
faults  
removed

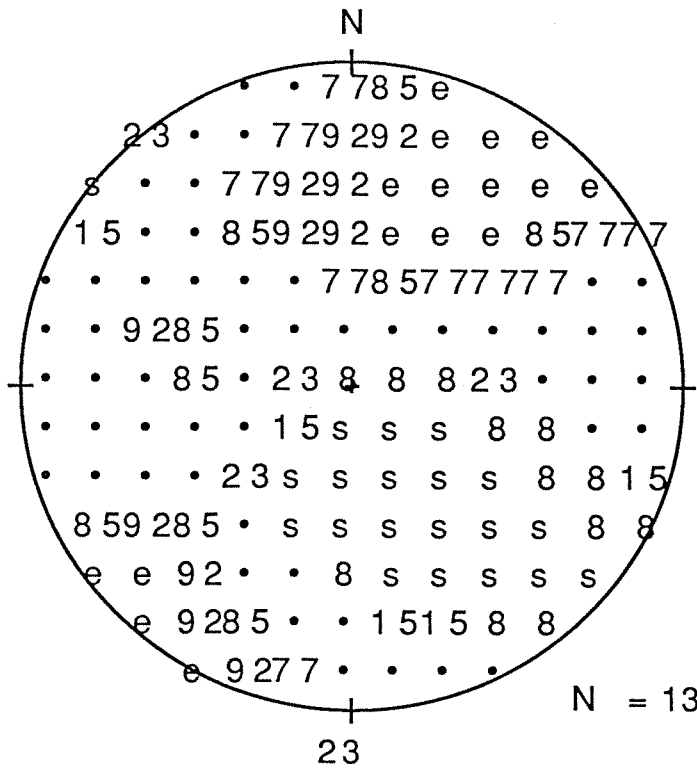

3 incompatible  
faults  
removed

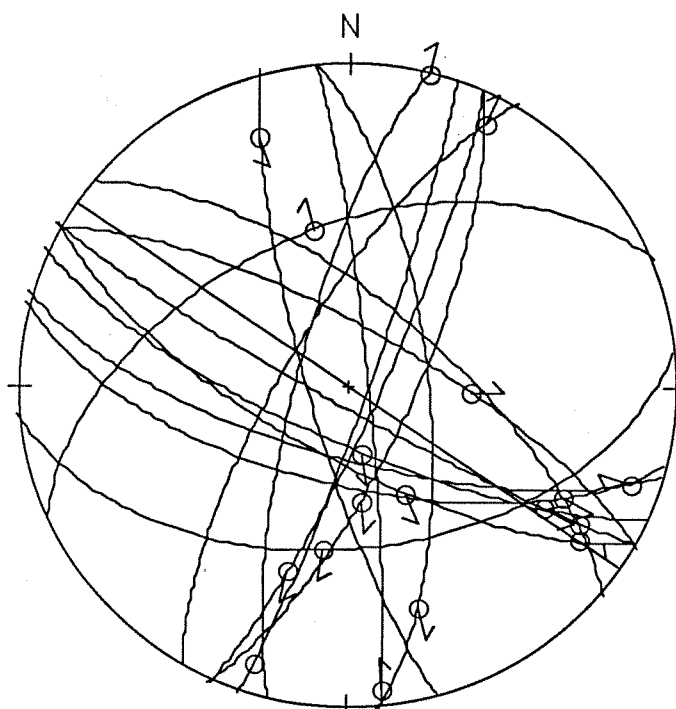

mw25

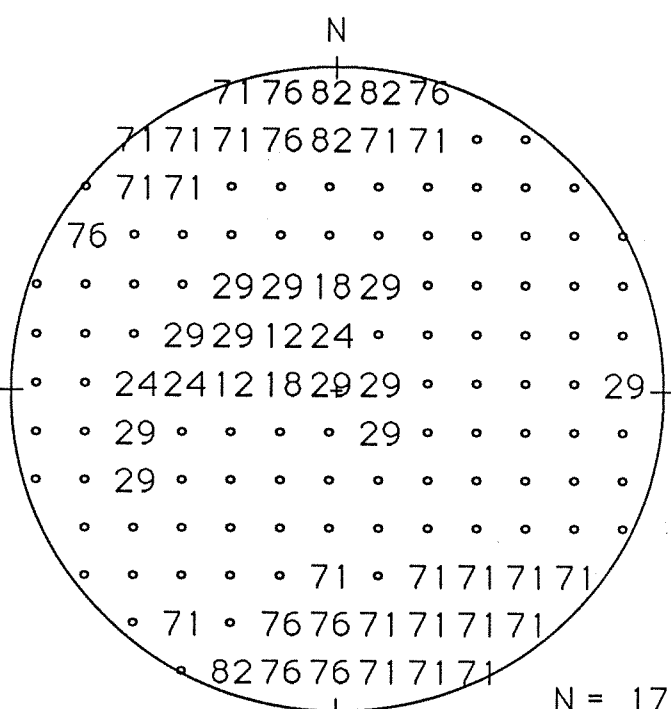

mw25

N = 17

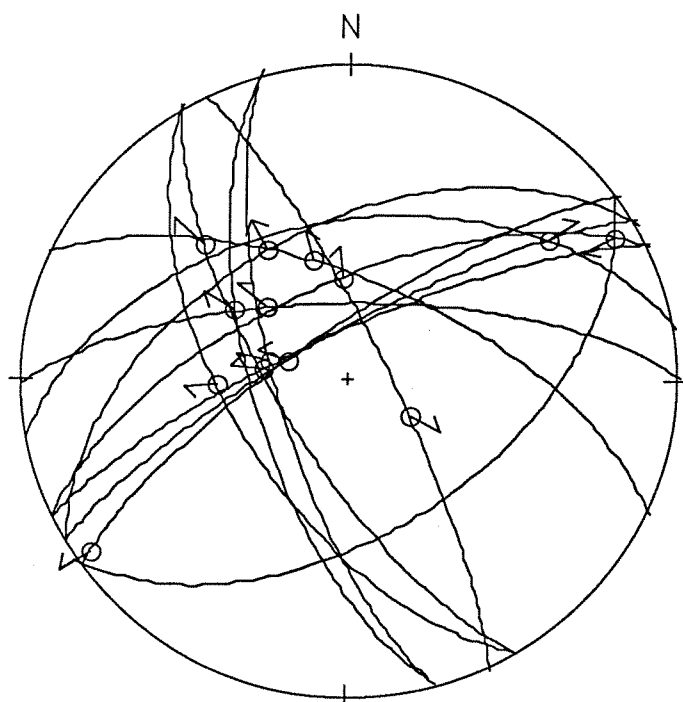

mw36

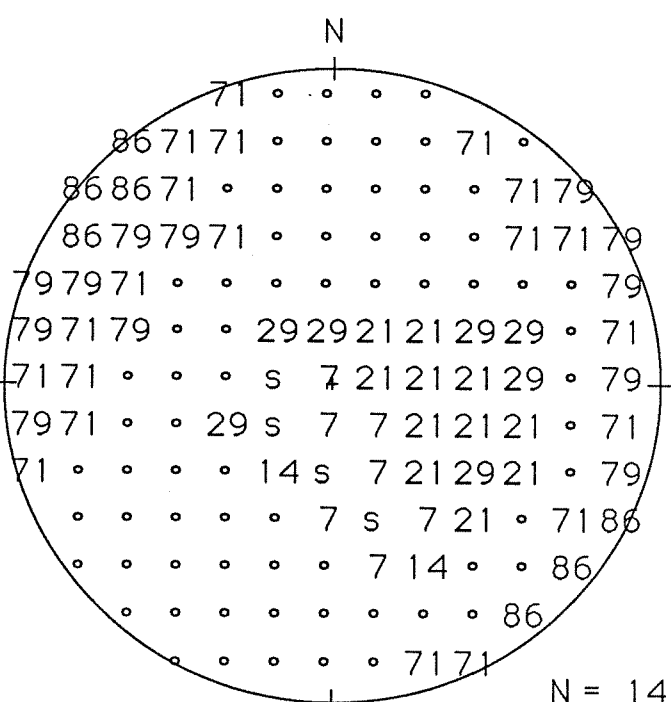

mw36

N = 14

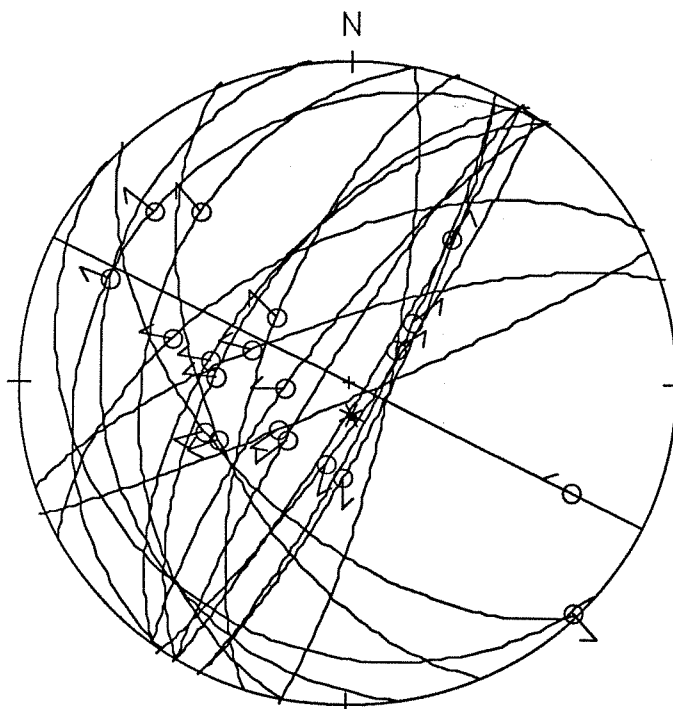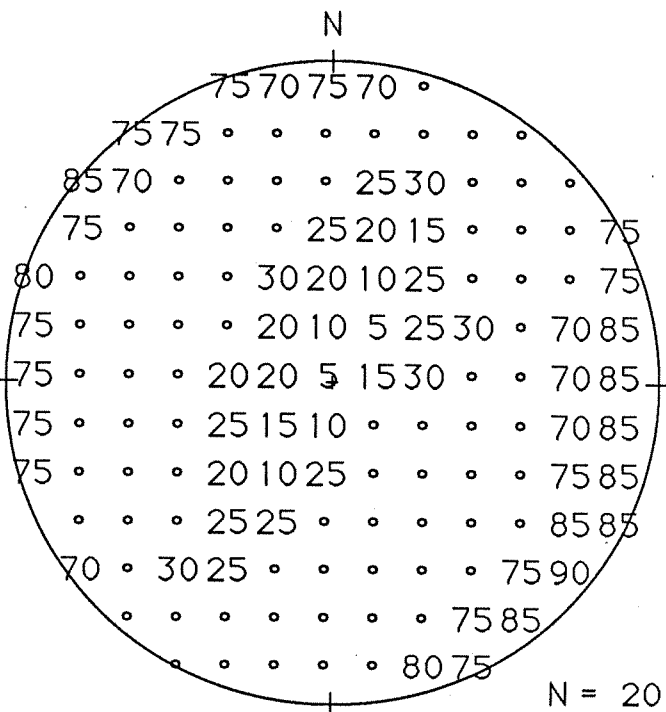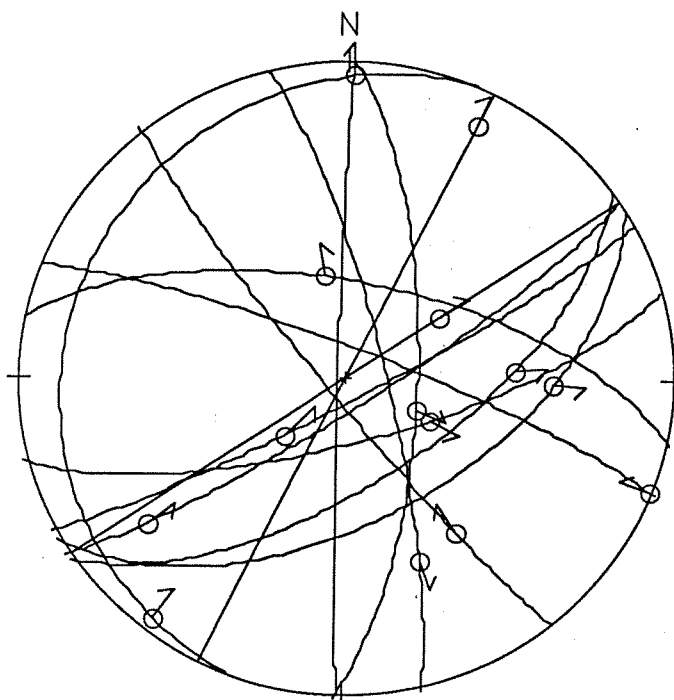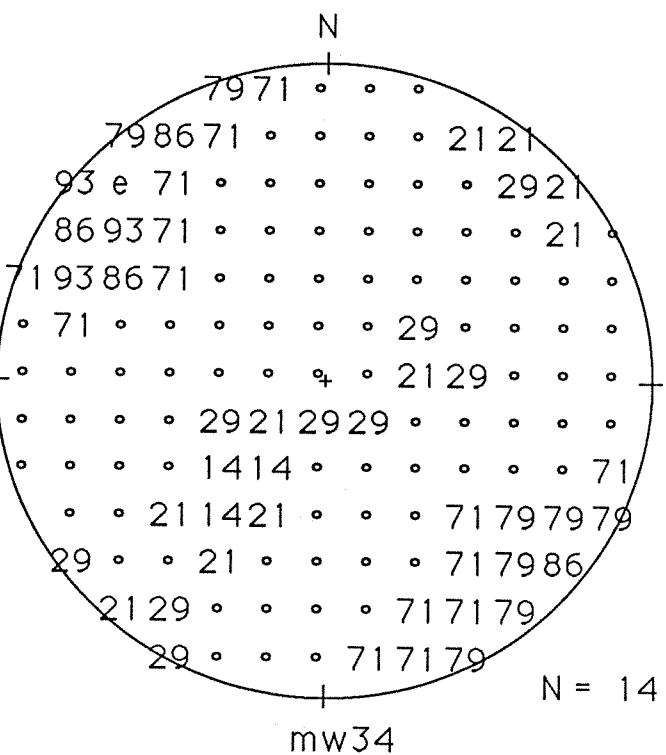



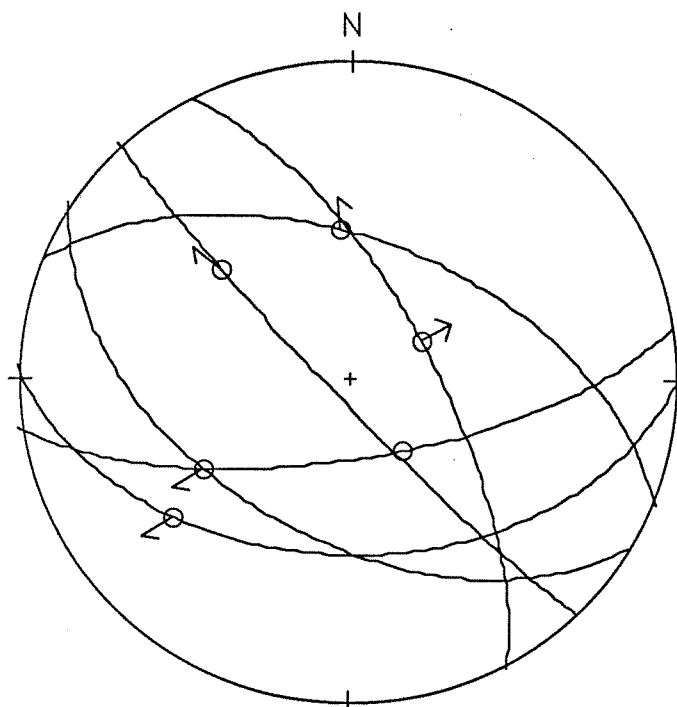

mw28

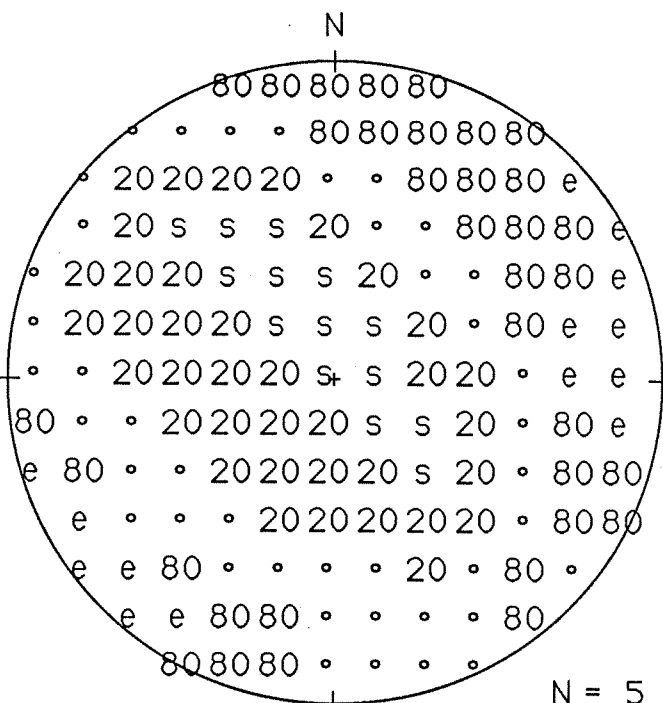

mw28

N = 5

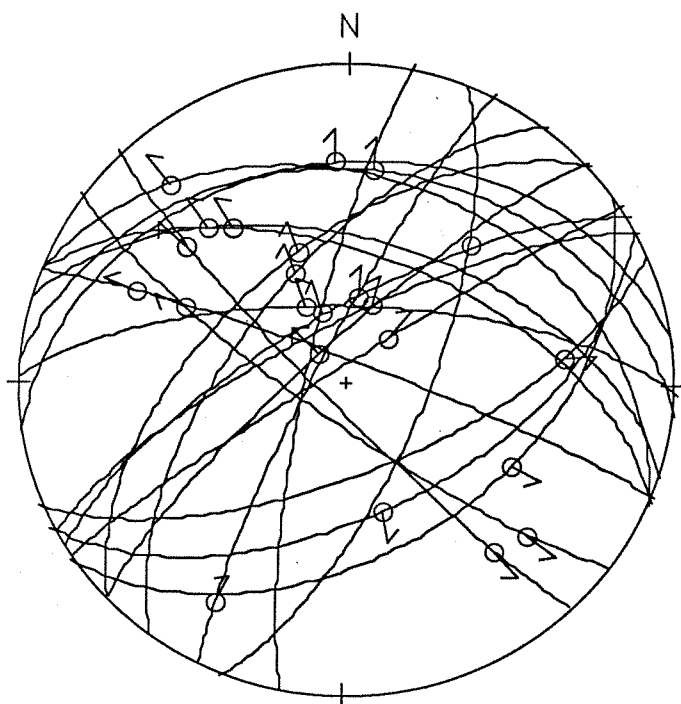

mw29

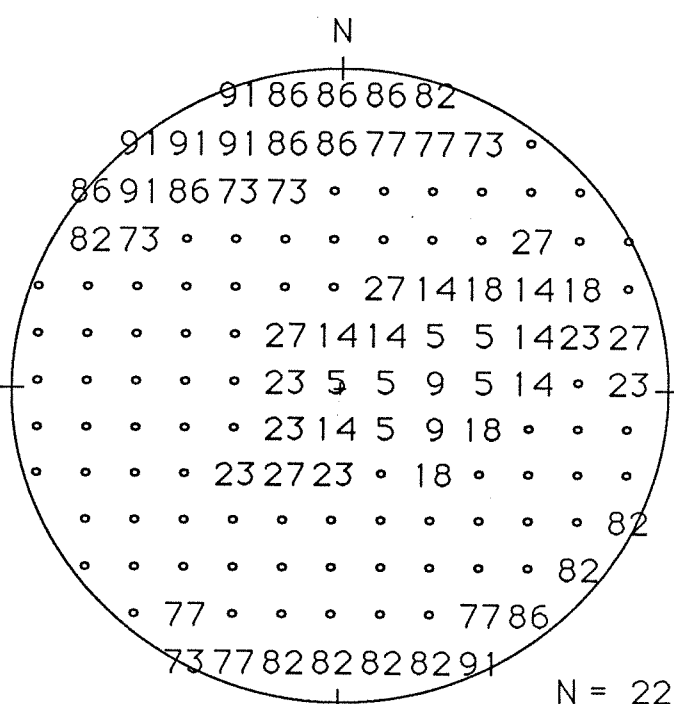

mw29

N = 22

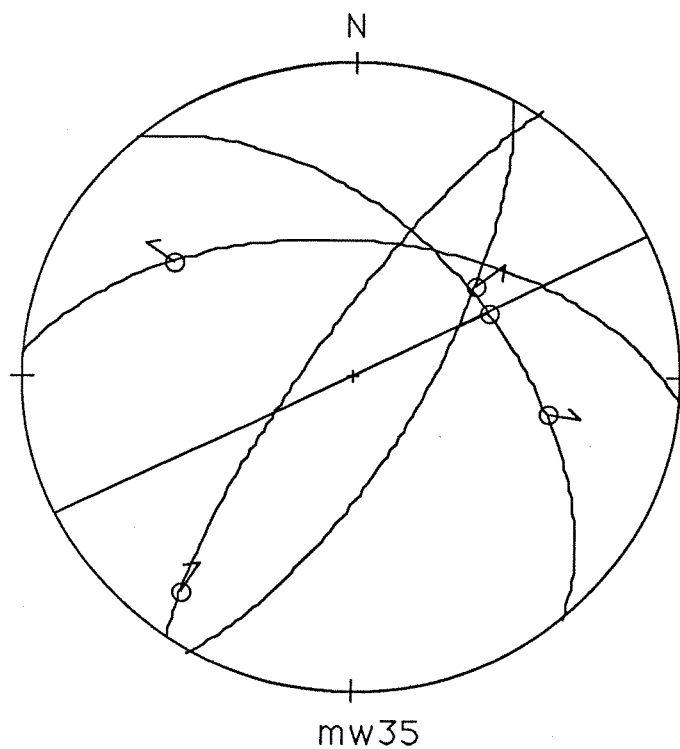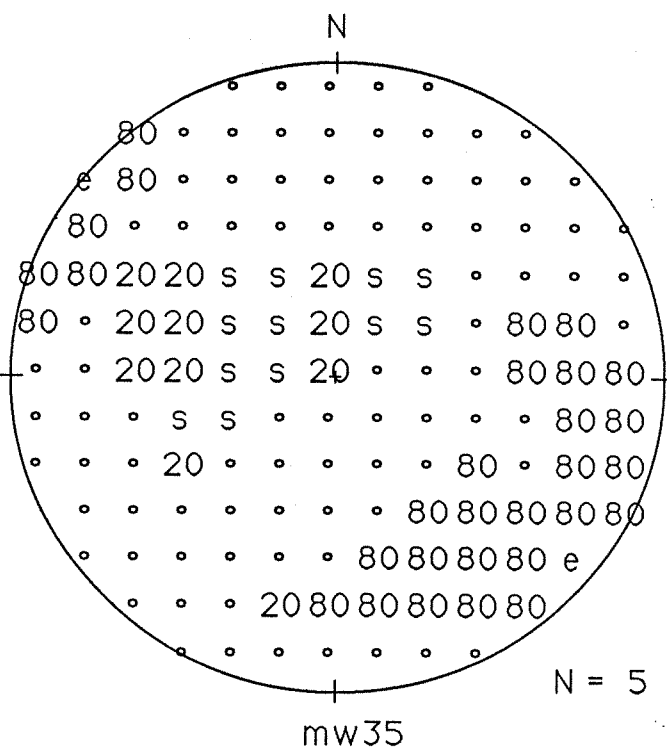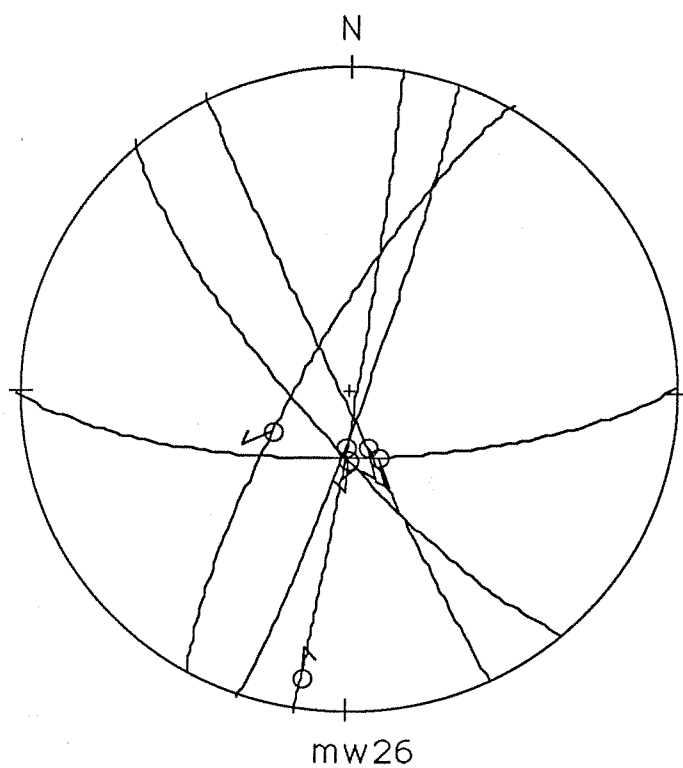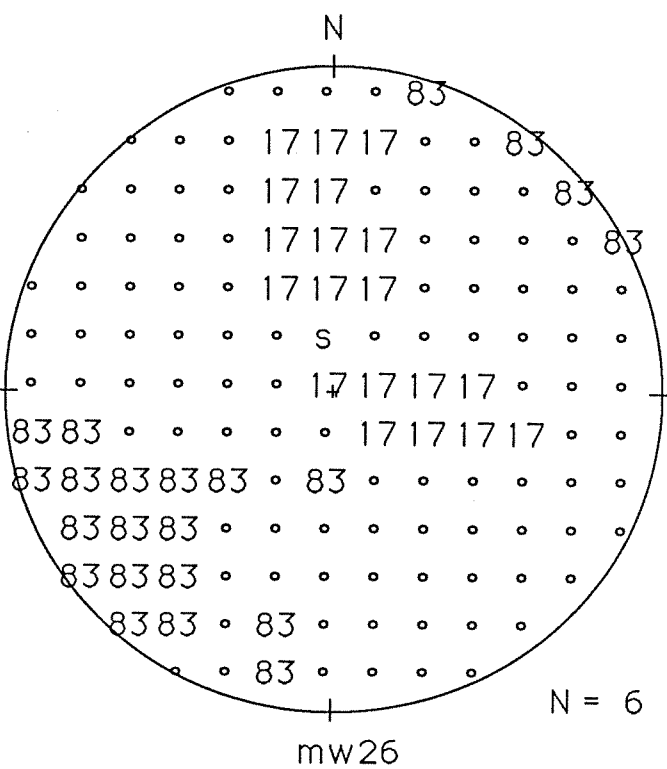

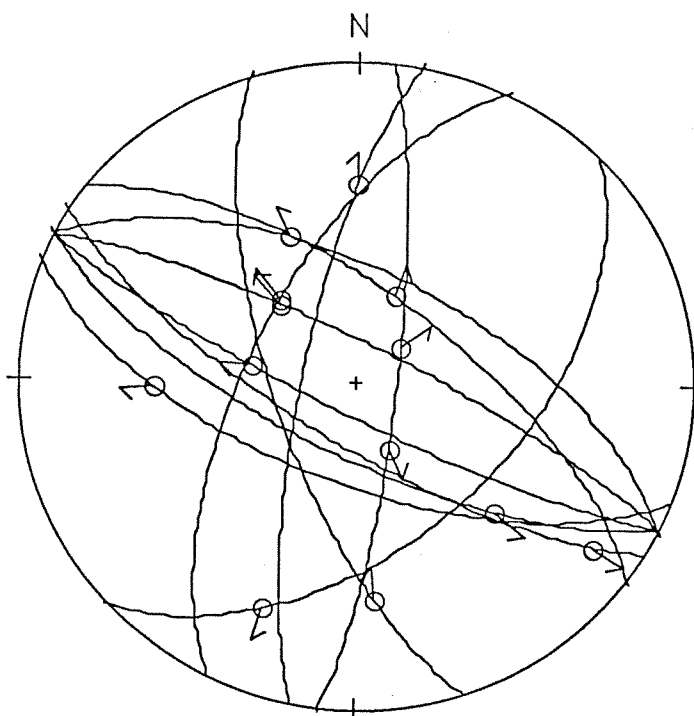

mw33

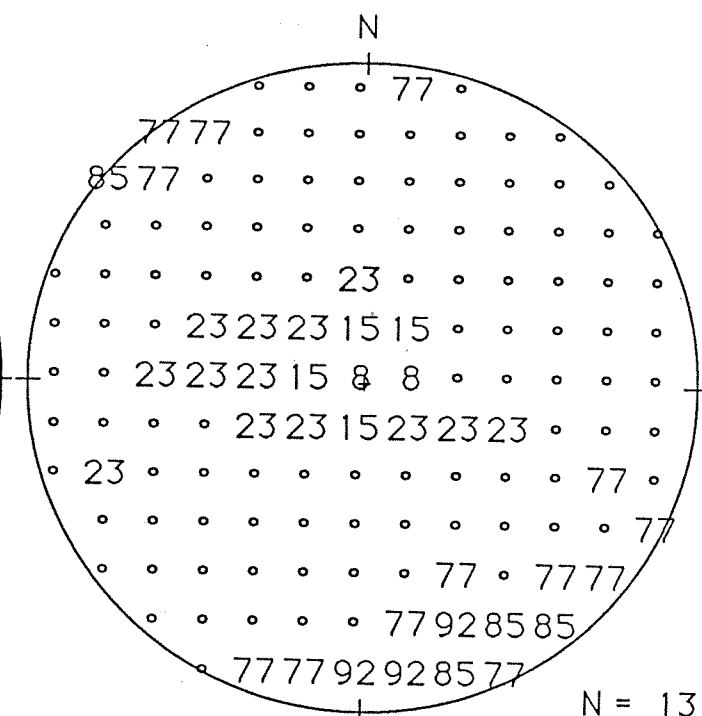

N = 13

mw33

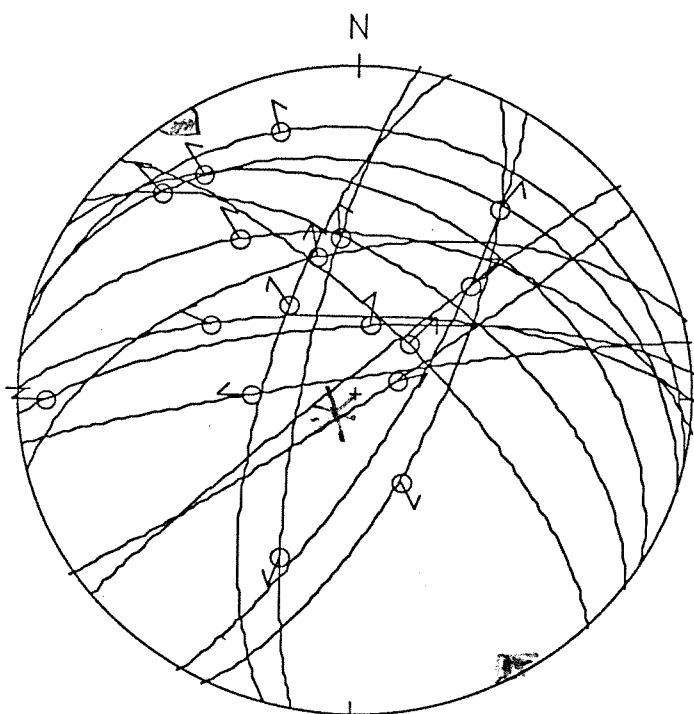

mw31

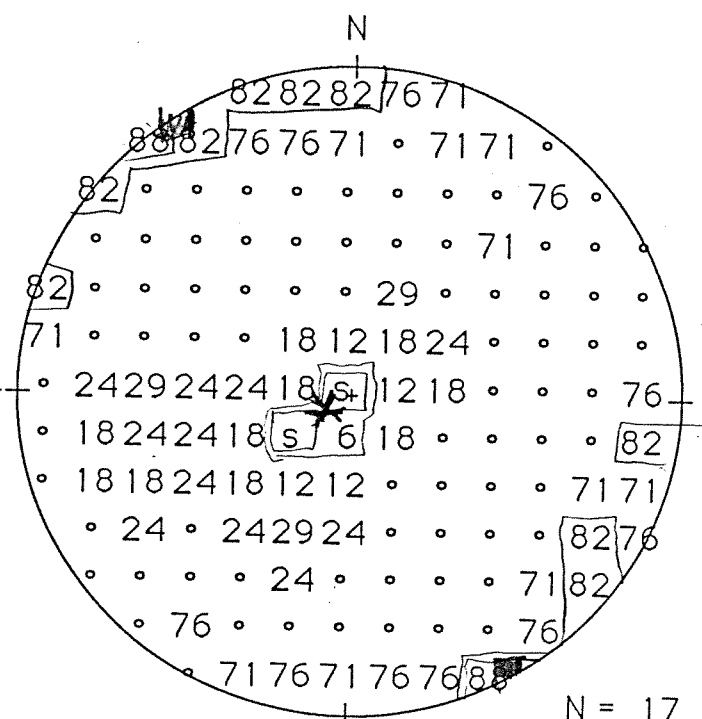

N = 17

mw31
